1 **Inhibition of autophagy as a novel therapy for the treatment of neurofibromatosis type**

2 **1 tumors**

3

4 Stevens, M.<sup>1,2</sup>, Wang, Y.<sup>1,3</sup>, Bouley, S.J.<sup>4</sup>, Mandigo, T.R.<sup>4</sup>, Sharma, A.<sup>4</sup>, Sengupta, S.<sup>1,2</sup>,

5 Housden, A.<sup>1</sup>, Oltean S.<sup>2</sup>, Perrimon, N.<sup>5,6</sup>, Walker, J.A.<sup>4,7\*</sup>, Housden, B.E.<sup>1,2,\*</sup>

6

7 <sup>1</sup> Living Systems Institute, University of Exeter, Exeter, UK

8 <sup>2</sup> Department of Clinical and Biomedical Science, University of Exeter, Exeter, UK

9 <sup>3</sup> The First People's Hospital of Qinzhou, China

10 <sup>4</sup> Center for Genomic Medicine, Massachusetts General Hospital, Boston, MA 02114, USA

11 <sup>5</sup> Department of Genetics, Blavatnik Institute, Harvard Medical School, Boston, MA, 02115,

12 USA

13 <sup>6</sup> Howard Hughes Medical Institute

14 <sup>7</sup> Cancer Program, Broad Institute of MIT and Harvard, Cambridge, MA 02142, USA

15

16 \* Correspondence to [b.housden@exeter.ac.uk](mailto:b.housden@exeter.ac.uk) or [jwalker1@mgh.harvard.edu](mailto:jwalker1@mgh.harvard.edu)

17

18

19 **Key Words**

20 Autophagy; Drosophila; Drug repurposing; Neurofibromatosis type 1; Synthetic lethality

21 **ABSTRACT**

22 Neurofibromatosis type 1 (NF1) is a genetic disorder associated with various symptoms  
23 including the formation of benign tumors along nerves. Drug treatments are currently limited.  
24 The MEK inhibitor selumetinib is used for a subset of cases but is not always effective and  
25 can cause side effects. Therefore, there is a clear need to discover new drugs to target *NF1*-  
26 deficient tumor cells. Using a *Drosophila* cell model of NF1, we performed synthetic lethal  
27 screens to identify novel drug targets. We identified 54 candidates, which were validated with  
28 variable dose analysis as a secondary screen. Five candidates could be targeted using  
29 existing drugs, with autophagy inhibitors (chloroquine (CQ) and bafilomycin A1) showing the  
30 greatest potential for selectively killing *NF1*-deficient *Drosophila* cells. When further  
31 investigating autophagy-related genes, we found that 14 out of 30 genes tested had a  
32 synthetic lethal interaction with *NF1*. These 14 genes are involved in the regulation of all  
33 aspects of the autophagy pathway and can be targeted with additional autophagy drugs,  
34 although none were as effective as CQ. The lethal effect of autophagy inhibitors was  
35 conserved in a panel of human *NF1*-deficient Schwann cell lines, highlighting their  
36 translational potential. The effect of CQ was also conserved in a *Drosophila NF1 in vivo* model  
37 and in a xenografted *NF1*-deficient tumor cell line in mice, with CQ treatment resulting in a  
38 more significant reduction in tumor growth than selumetinib treatment. Furthermore, combined  
39 treatment with CQ and selumetinib resulted in a further reduction in *NF1*-deficient cell viability.  
40 In conclusion, *NF1*-deficient cells are vulnerable to disruption of the autophagy pathway. This  
41 pathway represents a promising therapeutic target for *NF1*-associated tumors, and CQ was  
42 identified as a promising candidate drug for the treatment of *NF1* tumors.

43

44

45

46

47

48

## 49 INTRODUCTION

50 Neurofibromatosis type 1 (NF1) is a genetic disorder with autosomal-dominant inheritance  
51 affecting 1 in ~2,700 births (1, 2). Although the penetrance of NF1 is virtually complete after  
52 childhood, the disease is characterized by highly variable clinical expressivity. Symptoms  
53 include near universal benign, but often disfiguring, peripheral nerve associated tumors known  
54 as neurofibromas, as well as malignant tumors, including usually fatal malignant peripheral  
55 nerve sheath tumors (MPNSTs) (3). In part reflecting higher rates of vascular defects and  
56 cancer, the life expectancy of NF1 patients is reduced by approximately 15 years (4).

57

58 NF1 is caused by loss of neurofibromin, a 320 kDa protein whose only widely accepted  
59 function is to serve as a RAS GTPase Activating Protein (RASGAP) for H-, K-, N-RAS and R-  
60 RAS1, 2, and 3 (5-8). RASGAPs promote the conversion of active RAS-GTP into inactive  
61 RAS-GDP by stimulating the low intrinsic rate of RAS-GTP hydrolysis. Consequently, loss of  
62 neurofibromin can result in dysregulation of signaling downstream of RAS, the best  
63 documented being the RAF/MEK/ERK and PI3K/AKT/mTOR pathways (9). Although  
64 dysregulated RAS signaling is believed to be the proximal cause of NF1 symptoms, it is  
65 unclear which of the numerous effectors downstream of RAS are relevant for disease  
66 progression, as well as the identities of the disease-pertinent targets of the signaling pathways  
67 mediating their effects. The situation is further complicated since there is undoubtedly  
68 crosstalk between these different pathways. In patients with *NF1*-driven malignant tumors,  
69 targeting RAS pathway components such as MEK or ERK is a reasonable therapeutic option,  
70 although RAS is subject to highly robust regulation (9), which may explain why, despite  
71 considerable effort, effective therapies for RAS-driven cancers have been very challenging to  
72 develop. However, chronically blocking RAS may never be an appropriate strategy for treating  
73 the many serious but non-life-threatening symptoms of NF1, especially in children.

74

75 Currently, there are limited therapies for any *NF1*-associated tumors. The only available drug  
76 is the MEK inhibitor selumetinib, which was approved for use in a subset of pediatric plexiform  
77 neurofibromas in April 2020. However, not all tumors were responsive to treatment and serious  
78 side effects can be associated with MEK inhibition (10-13). Therefore, there is a clear clinical  
79 need to discover new drugs that specifically target *NF1*-deficient tumor cells either alone or in  
80 combination with selumetinib.

81

82 One approach to identify candidate drug targets for tumorigenic diseases is the use of  
83 synthetic lethal interaction screens. Synthetic lethal interactions are a type of genetic  
84 interaction in which inhibition of either of two genes alone is viable, but the combined inhibition  
85 of both genes is inviable. When one of these genes is mutated in tumor cells, such interactions  
86 can be exploited to kill those cells exclusively by targeting the synthetic lethal partner gene  
87 using a drug (14, 15). This approach is attractive because treatment is expected to be lethal  
88 to tumor cells but have no effect on wild-type, healthy cells.

89

90 Despite long-term interest in the use of synthetic lethality as a therapeutic strategy to treat  
91 tumors, few drugs have successfully progressed to clinical use. A major factor preventing  
92 successful development of treatments against synthetic lethal interactions is a lack of  
93 consistency between interactions identified in different genetic backgrounds (16). Therefore,  
94 candidates identified from a single model system often fail to translate to other model systems  
95 and subsequently to clinical use. To overcome this limitation, our approach makes use of  
96 diverse model systems by first screening for synthetic lethal interactions with genes mutated  
97 in tumors using *Drosophila* cells. The conservation of candidate interactions can then be  
98 assessed in a range of other model systems, including human cells, providing a filter to remove  
99 interactions that are specific to a single model system. This approach has previously proved  
100 successful, leading to the discovery of mizoribine and palbociclib as promising candidates for  
101 the treatment of tuberous sclerosis complex (TSC) and Von Hippel-Lindau (VHL)-linked

102 cancers, respectively (17-19). In both cases, hits from *Drosophila* synthetic lethal screens  
103 were validated with a high success rate in both human cells and mouse models.

104

105 Given the previous success of using the *Drosophila* approach, we have applied this method  
106 to identify candidate drug targets to treat *NF1*-deficient tumors. Here, we describe the  
107 generation of a *dNF1* null mutant *Drosophila* cell line using CRISPR gene editing and its use  
108 in 1) conducting synthetic lethal screens to identify perturbed pathways that confer  
109 vulnerability of *NF1*-deficient cells, and 2) to identify candidate drug targets that might be used  
110 for therapeutic benefit to specifically kill *NF1*-associated tumors. We find *dNF1*-deficient cells  
111 are vulnerable to inhibition of autophagy. Importantly, we show that this selective effect can  
112 be reproduced with multiple inhibitors and in several human tumor-derived cell lines, as well  
113 as in a *Drosophila in vivo* *NF1* model and xenografts of *NF1*-deficient tumor cell lines in mice,  
114 indicating that these repurposed drugs may have promise for the treatment of *NF1* tumors.  
115 Finally, we show that combined treatment with CQ or bafilomycin A1 and selumetinib results  
116 in increased selective killing of *NF1*-deficient cells, indicating the potential for combinatorial  
117 therapy.

118

## 119 **RESULTS**

### 120 **Generation of *Drosophila* and human Schwann cell *NF1* models using CRISPR/Cas9** 121 **gene editing**

122 Our previous studies have demonstrated the potential of using cross-species genetic screens  
123 to identify candidate therapeutic targets for human disease (17-20). The *NF1* gene is well  
124 conserved between *Drosophila* and humans with 68% identity at the amino acid level (**Figure**  
125 **S1**). To use the same approach to find new targets for the treatment of *NF1*-associated  
126 tumors, we first used CRISPR gene editing to generate indel mutations in *dNF1* in *Drosophila*  
127 S2R+ cells. Sequencing was used to confirm that the induced frame-shift mutations resulted

128 in null *dNF1* alleles (**Figure 1A**). Of note, S2R+ cells are aneuploid (21), and our sequencing  
129 results suggest that they have three copies of the *dNF1* gene.

130

131 The resulting dNF1-KO S2R+ cell line (hereafter called dNF1-KO) was characterized by  
132 assessing the expression of neurofibromin using western blots. We found no detectable signal  
133 in the dNF1-KO line compared to parental wild-type (WT) S2R+ cells (**Figure 1B, Figure S2A**).  
134 However, we found no significant increase in pERK levels in dNF1-KO cells under normal  
135 culturing conditions, suggesting that other growth conditions (i.e., reduced serum) may be  
136 necessary to exacerbate differences in RAS signaling, as is necessary in other NF1 cell line  
137 models (**Figure 1B-C, Figure S2B**). Given that neurofibromin is a negative regulator of RAS,  
138 we assessed the growth and proliferative phenotypes of dNF1-KO cells compared to S2R+  
139 cells. Consistent with deregulation of a mitogenic pathway, dNF1-KO cells showed an  
140 increased rate of growth as measured using CellTiter-Glo assays to assess total ATP levels  
141 in the population. This effect was observed in both the presence and absence of serum in the  
142 culture media (**Figure 1D**), indicating that culture growth is both accelerated in the absence of  
143 dNF1 and is decoupled from upstream growth factor signaling pathways. To determine  
144 whether this increase in culture growth was due to increased proliferation, increased cell  
145 growth, or both, we performed cell counts following culture in full serum and CellTiter-Glo  
146 assays on normalized numbers of cells from each genotype (baseline readings). Cell counts  
147 for dNF1-KO showed an increase in cell numbers following culture compared to S2R+ cells,  
148 and the 'baseline' CellTiter-Glo showed no difference (**Figure 1D**). This suggests that the  
149 difference in culture growth is primarily due to increased cell proliferation rather than an  
150 increase in the cell size or ATP content of the cells. Together, these results indicate that the  
151 dNF1-KO line represents a novel *dNF1* null mutant cell model, with properties consistent with  
152 known effects of NF1 loss.

153

154 We also utilized CRISPR/Cas9 gene editing to generate indel mutations within exon 3 of *NF1*  
155 in wild-type immortalized human Schwann cells (ipn02.3 2λ). Sequencing of single cell clones  
156 was used to confirm out-of-frame deletions in one or both *NF1* alleles, resulting in *NF1*-  
157 deficient cell lines (**Figure 1E**). The resulting heterozygous (C8) and homozygous (C23) cell  
158 lines were characterized by assessing neurofibromin expression using western blots (**Figure**  
159 **1F, Figure S2C**). Consistent with what we observed in dNF1-KO cells, there was no significant  
160 increase in pERK expression under normal culturing conditions (**Figure 1F-G, Figure S2D**).  
161 These results suggest that these otherwise isogenic human cell lines are an appropriate model  
162 to validate any results obtained in our dNF1-KO cell lines.

**A**

**NF1 Exon 2** **sgRNA** **PAM** **Intron 3**

Ref GGCCTGTCTGATCCACATATCGCGCTAC**CGCTTCTCCCTTGTCATATCCGG**TCTCACCAAGATGCTGCAGAGGGTCAATGAGGCGgtaagtact  
 A C L I H I S R Y R F S L V I S G L T K M L Q R V N E A

GGCCTGTCTGATCCACATATCGCGC-----ATCCGGTCTCACCAAGATGCTGCAGAGGGTCAATGAGGCGgtaagtact  
 A C L I H I S R I R S H Q D A A E G Q \*

GGCCTGTCTGATCCACATATCGCGCTACCGCTT-----TATCCGGTCTCACCAAGATGCTGCAGAGGGTCAATGAGGCGgtaagtact  
 A C L I H I S R Y R F I R S H Q D A A E G Q \*

GGCCTGTCTGATCCACATATCGCGCTACCGC-----TATCCGGTCTCACCAAGATGCTGCAGAGGGTCAATGAGGCGgtaagtact  
 A C L I H I S R Y R Y P V S P R C C R G S M R R \*

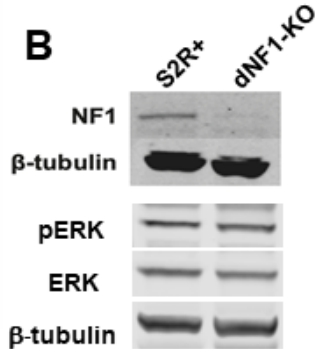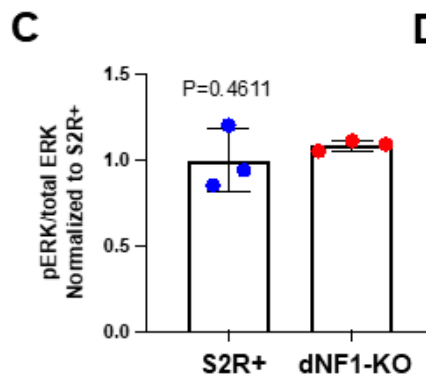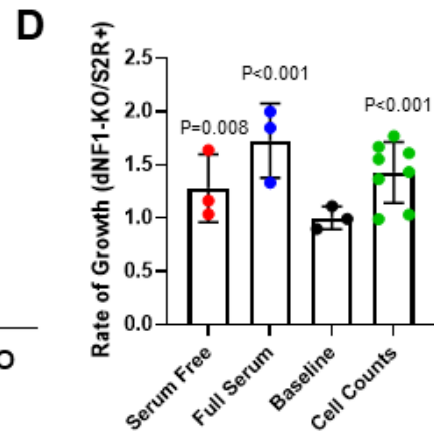

**E**

**exon 3** **NF1 sg2** **PAM** **intron 3**

ipn02.3 2λ  
NF1+/+ GGATACACTGGAAAAATGCTCTTGTGCTGGG taagtaaattga...

C8 NF1+/-  
(c.282delT) GGATACACTGGAAAAATGCTCT<sup>-</sup>GCTGGG taagtaaattga...

C23 NF1-/  
(c.282delT/  
c.282-283delTG) GGATACACTGGAAAAATGCTCT<sup>-</sup>GCTGGG taagtaaattga...

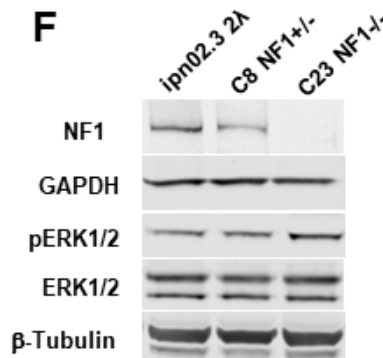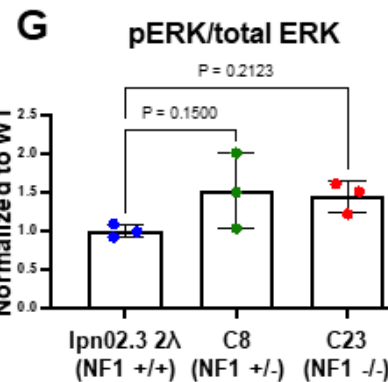



164 **Figure 1. Generation and characterization of NF1-deficient Drosophila and human**  
165 **Schwann cells using CRISPR. (A)** *Drosophila* S2R+ cells were transfected with Cas9 and  
166 sgRNA designed to target a double-stranded break in exon 2 of dNF1. Molecular analysis of  
167 the dNF1-KO line revealed deletions of 20, 11 and 13bp in three alleles (S2R+ cells are  
168 aneuploid). The position of the guide RNA is shown in blue and the PAM site in red. Predicted  
169 effect of deletions on the amino acids in each allele are shown, each resulting in premature  
170 termination. **(B)** Representative image of western blot showing loss of neurofibromin in dNF1-  
171 KO cells compared to WT S2R+ cells (two replicates performed) and pERK and total ERK  
172 levels in S2R+ and dNF1-KO cells under normal culturing conditions (10% serum). **(C)**  
173 Quantification of pERK/ERK ratio in S2R+ and dNF1-KO cells (in 10% serum) shows no  
174 significant change (from triplicate experiments). **(D)** Characterization of dNF1-KO cell  
175 population growth and proliferation rate as assessed using CellTiter-Glo assays (n=3-8, error  
176 bars indicate standard deviation, p values determined using unpaired (except for cell counts,  
177 which were paired), two-tailed t-tests) or cell counts. **(E)** CRISPR/Cas9 was used to target  
178 exon 3 of NF1 in a telomerase-immortalized human Schwann cell line (hTERT ipn02.3 2λ)  
179 (22) to generate isogenic NF1 knock out (NF1-/+ and NF1-/-) cell lines. Line C8 has a  
180 heterozygous 1 bp deletion (c.282delT) and line C23 is a transheterozygous combination of 1  
181 bp (c.282delT) and 2 bp deletions (c.282-283 delTG). Position of the guide RNA (NF1-sg2) is  
182 shown in blue. **(F)** Western blot analysis of cell lines showing reduction (C8) and absence  
183 (C23) of neurofibromin compared to the wild-type ipn02.3 2λ progenitor Schwann cell line.  
184 pERK and total ERK levels were assessed in cells grown in 10% serum. **(G)** Quantification of  
185 pERK/ERK ratios shows no significant change between wild-type and C8 or C23 (from  
186 triplicate experiments).

187

188

189

190 **Mapping synthetic lethal interactions in dNF1-KO cells using a genome-wide RNAi**  
191 **screen**

192 We used a genome-wide dsRNA library to screen in both S2R+ and dNF1-KO cells for  
193 synthetic lethal interactions (**Figure S3**). Correlation coefficients ranged between 0.9 and 0.99  
194 (average 0.93) for control wells and between 0.55 and 0.66 (average 0.61) for non-control  
195 wells, illustrating a high rate of reproducibility between replicates. Next, we identified synthetic  
196 lethal interactions by filtering the results for dsRNA reagents that reduced the viability of dNF1-  
197 KO cells (median  $Z < -1.5$ ) to a greater extent than wild-type cells (median  $Z \geq -1.5$ ). This  
198 analysis identified 134 candidate genes (**Table S1**).

199

200 Genetic screens are often associated with false-positive results due to off-target effects from  
201 dsRNA reagents or noise in the screen assay. To remove potential false positives, we overlaid  
202 the screen hits onto a protein-protein interaction network from the String database (23).  
203 Synthetic lethal interactions are generally similar between genes that have related functions;  
204 therefore, proteins that physically interact are expected to share synthetic lethal interactions.  
205 Using the combination of physical and genetic interaction data, we could remove false  
206 positives from the screen results by isolating only hits that have physical interactions with at  
207 least one other hit from the genetic interaction screen. In addition, we filtered the candidates  
208 to isolate only those with clear orthologs in humans. Following this process, 54 high-  
209 confidence candidate targets remained, corresponding to 74 human genes (**Figure 2A, Table**  
210 **S2**).

211

212 **Validation of candidate synthetic lethal interactions using Variable Dose Analysis**  
213 **(VDA)**

214 We used the VDA assay as an additional combinatorial screen to assess synthetic lethality  
215 between *dNF1* and all 54 candidate drug targets. Two shRNAs targeting each of the genes

216 were generated. These reagents were tested in S2R+ and dNF1-KO cells. Of the 54 genes,  
217 46 showed a >10% reduction in viability in dNF1-KO cells compared to S2R+ controls (**Figure**  
218 **2B**; ranked in order of effect on dNF1-KO viability). These results indicate that the network is  
219 a reliable representation of the synthetic lethal interaction profile of the *dNF1* gene.

220

221 To identify potential drugs for repurposing to treat NF1 tumors, we filtered the candidate gene  
222 list to those that could be targeted using existing drugs, resulting in eight candidate drug  
223 targets (**Figure 2C**). We then removed candidates that had previously been studied in relation  
224 to NF1, leaving five candidate drug targets. We also included MEK (selumetinib) as a control.  
225 Note that three drugs that target autophagy were included, and some drugs inhibited multiple  
226 targets. In total we tested seven candidate drugs inhibiting six different targets (**Table 1**).

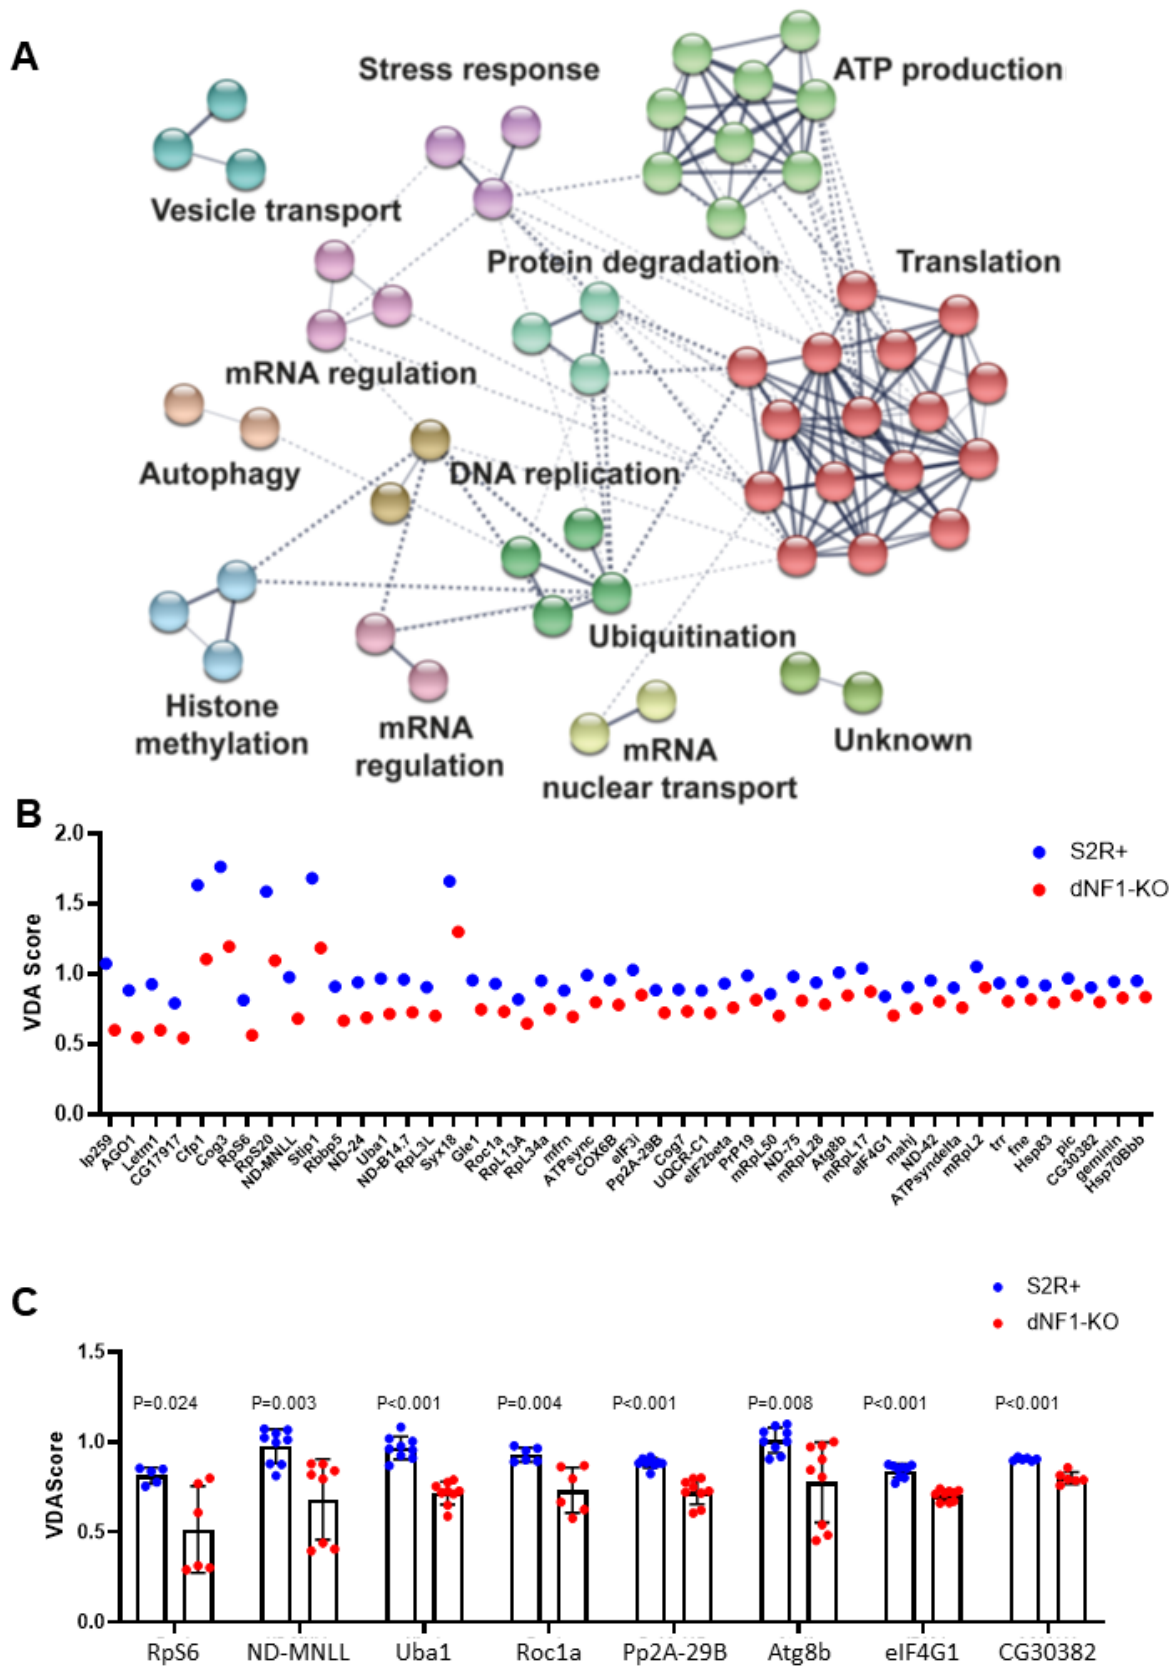

228 **Figure 2. A network of synthetic lethal interaction for *Drosophila* dNF1 and VDA**  
229 **analysis of candidate drug targets.** Using wild-type S2R+ and dNF1-KO cells, we used a  
230 near genome-wide dsRNA library to screen approximately 10000 genes for difference in  
231 viability when expression is knocked down as assessed by CellTiter-Glo assays, resulting in  
232 134 genes identified as having a synthetic lethal interaction with NF1. **(A)** A synthetic lethal  
233 interaction network for dNF1 in *Drosophila* S2R+ cells generated using Cytoscape (24). Solid  
234 lines represent physical interactions within functional groups and dashed lines represent  
235 physical interactions between functional groups. **(B)** VDA assays were performed for all 54  
236 candidate genes, with two shRNAs per gene, in WT S2R+ (blue) and dNF1-KO (red) cells.  
237 The best shRNA from the 46 genes that reduced dNF1-KO viability by >10% relative to S2R+  
238 controls ranked in order of effect are shown. **(C)** shRNA knockdowns of candidate genes that  
239 resulted in a >10% reduction in dNF1-KO viability compared to S2R+ controls and were  
240 druggable targets (n=6-9, error bars indicate standard deviation). All eight shRNAs showed a  
241 significant reduction in dNF1-KO viability relative to S2R+ controls assessed using two-tailed,  
242 unpaired t-tests. Results in panel C are reproduced from panel B for clarity.  
243  
244

245 **Table 1. Candidate genes that selectively decreased dNF1-KO viability that can be**  
246 **targeted with drugs, either directly or through pathway inhibition.**

| Drug           | Target (direct or indirect): DM (Human) |
|----------------|-----------------------------------------|
| Chloroquine*   | Autophagy; Atg8b (GABARAP), RpS6 (RPS6) |
| EAD1           | Autophagy; Atg8b (GABARAP), RpS6 (RPS6) |
| Selumetinib*   | Dsor1 (MEK, MAPKK)                      |
| Metformin*     | ND-MNLL (NDUFB1)                        |
| PYR41          | Uba1 (UBA1)                             |
| LB100          | Pp2A-29B (PPP2R1A and PPP2R1B)          |
| Bafilomycin A1 | Autophagy; Atg8b (GABARAP), RpS6 (RPS6) |

247 \*FDA-approved

248

#### 249 **Existing inhibitors selectively affect dNF1-KO *Drosophila* cells**

250 Repurposing existing drugs represents the most efficient route to develop new therapeutics.  
251 Each of the seven drugs that target the *dNF1* synthetic lethal partner genes were first tested  
252 in S2R+ and dNF1-KO cells using CellTiter-Glo assays to measure viability after 48 h of  
253 treatment (**Figure S4**). Of the seven drugs tested in *Drosophila* cells, we selected the two  
254 autophagy inhibitors (CQ and bafilomycin A1) for further study, as both showed a significant  
255 and consistent effect on reducing dNF1-KO viability.

256

257 One of the strongest hits from the genetic screen was *Atg8b*, which encodes a key component  
258 of the autophagy pathway. Autophagy is commonly inhibited experimentally using CQ, which  
259 is clinically used as an anti-malarial and shows anti-viral properties, and bafilomycin A1. CQ  
260 functions to inhibit autophagy by blocking the binding of autophagosomes to lysosomes by  
261 diffusing into the lysosomes and altering the acidic environment, thereby inhibiting autophagic  
262 lysosomal degradation (25). On the other hand, bafilomycin A1 disrupts autophagic flux by  
263 independently inhibiting V-ATPase-dependent acidification and Ca-P60A/SERCA-dependent  
264 autophagosome-lysosome fusion (26). We initially focused on CQ because it is generally well-  
265 tolerated (27) and can inhibit autophagy *in vivo* at clinically achievable concentrations (28).  
266 Bafilomycin A1 is a potent inhibitor of autophagy but is not clinically approved (29).  
267 Nevertheless, we tested bafilomycin A1 to provide additional validation of the effects on  
268 autophagy inhibition brought about through an independent mechanism.

269

270 First, we quantified autophagic flux in dNF1-KO and S2R+ cells without drug treatment, i.e.,  
271 how many autophagosomes form and then become degraded, by measuring the difference in  
272 the number of autophagic vesicles in the presence versus the absence of a lysosomal inhibitor,  
273 CQ. We observed significantly higher levels of autophagic flux in dNF1-KO cells under serum-  
274 free conditions compared to S2R+ controls (**Figure 3A**). We then tested whether CQ and  
275 bafilomycin A1 would phenocopy the selective effect observed using genetic inhibition of  
276 *Atg8b* in *Drosophila* cells. Both S2R+ and dNF1-KO cells were treated with varying doses of  
277 CQ or bafilomycin A1 and cell viability was measured using CellTiter-Glo assays, PI staining,  
278 and annexin V staining. A significantly greater effect on dNF1-KO cell viability was observed  
279 at multiple concentrations of each drug in serum-free media after 48 h of treatment across all  
280 three assays, further validating the interaction between autophagy and NF1 and  
281 demonstrating that the effect is cytotoxic (**Figure 3B-F**).

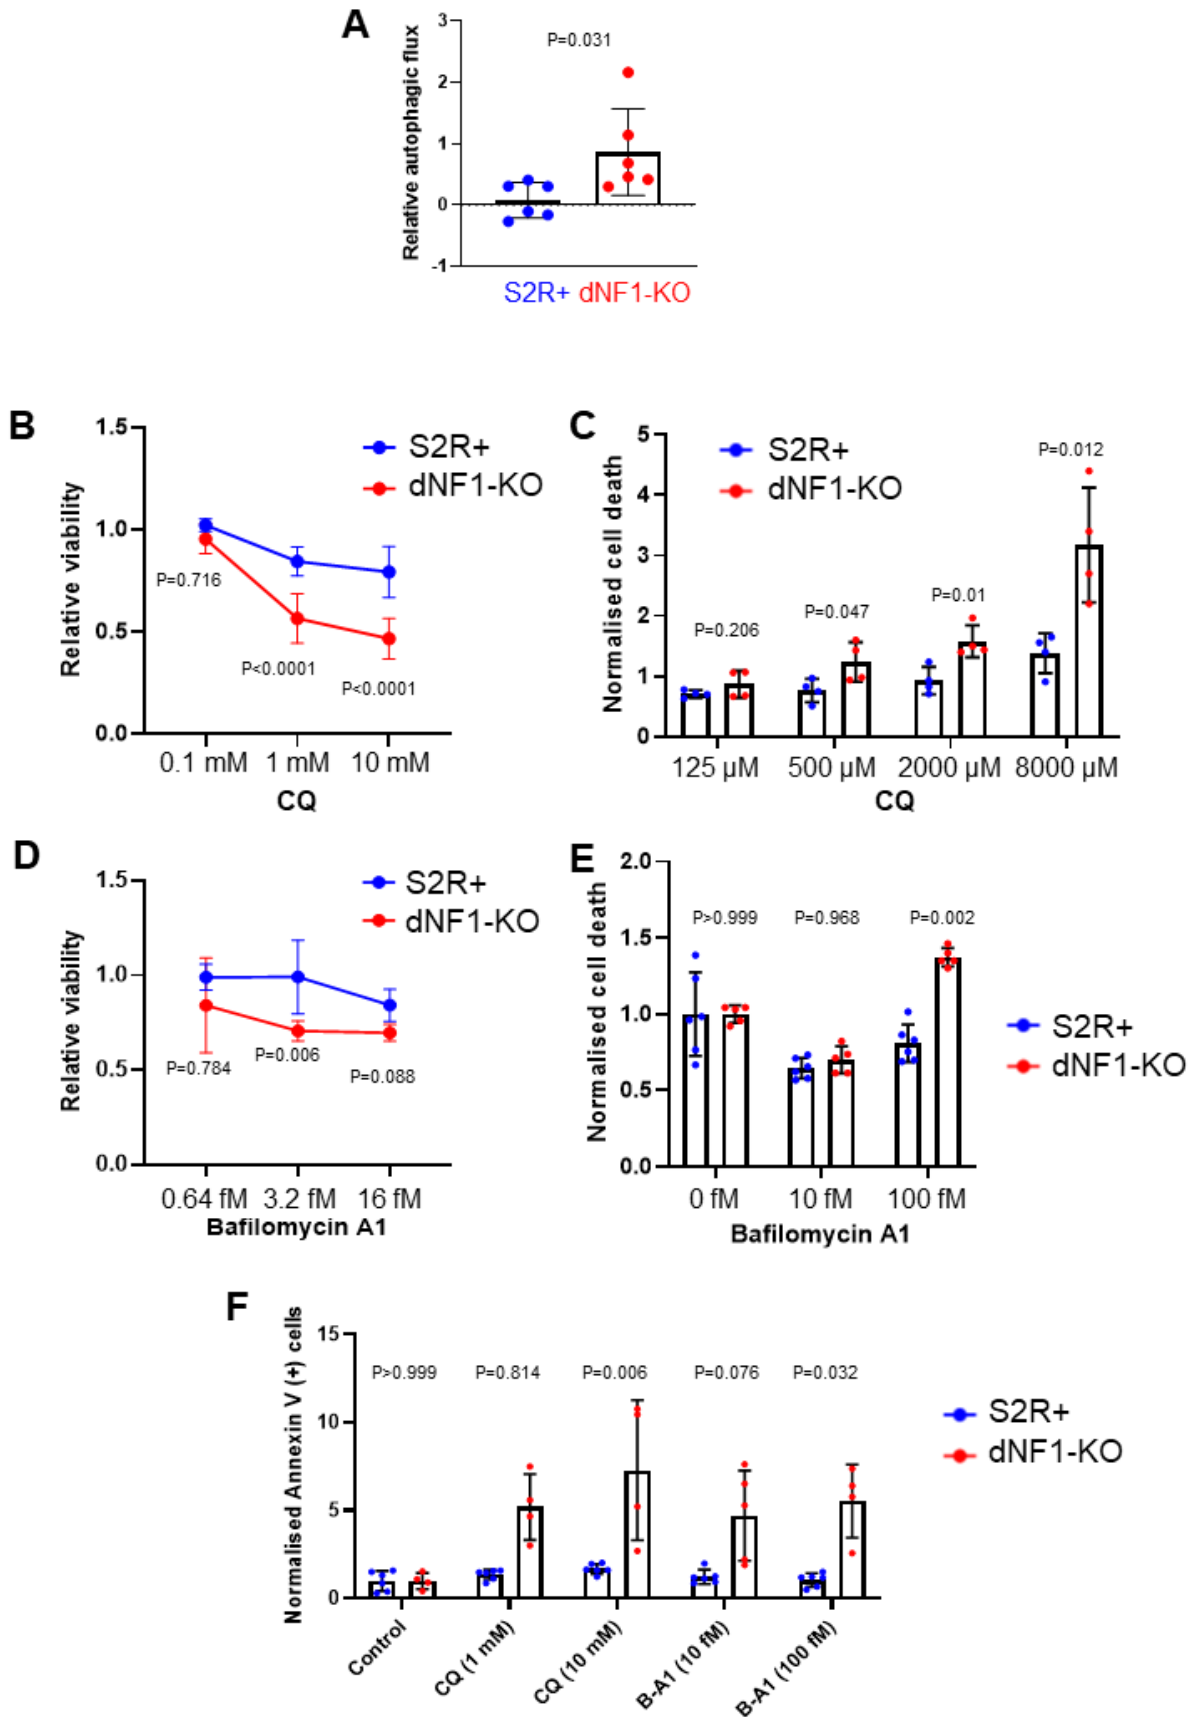



283 **Figure 3. CQ and bafilomycin A1 selectively affect dNF1-deficient Drosophila cells. (A)**  
284 *dNF1-KO cells show a significant increase in autophagic flux compared to WT S2R+ control*  
285 *cells in serum-free media as assessed by inhibiting autophagosome flux for 4 h using the*  
286 *lysosomal inhibitor CQ (10  $\mu$ M), and then measuring the initial rate of accumulation of the*  
287 *fluorescent substrate labelling the autophagosomes using a fluorescent plate reader*  
288 *(normalized to DAPI, and then to S2R+ controls) (n=6, p value obtained using the two-tailed,*  
289 *unpaired, Student's t-test). (B) CQ reduced dNF1-KO cell viability compared to S2R+ cells*  
290 *after 48 h in serum-free media as measured using CellTiter Glo assays (n=4; p values obtained*  
291 *using a two-way ANOVA with Tukey for multiple comparisons). (C) Analysis of cell death using*  
292 *PI staining with CQ in S2R+ and dNF1-KO cells grown in serum-free media (n=4; p values*  
293 *obtained using a two-way ANOVA with Tukey for multiple comparisons). (D) Bafilomycin A1*  
294 *reduced dNF1-KO cell viability compared to S2R+ cells after 48 h in serum-free media using*  
295 *the CellTiter Glo assay (n=4; P values obtained using a two-way ANOVA with Tukey for*  
296 *multiple comparisons). (E) Analysis of cell death using PI staining with bafilomycin A1 in S2R+*  
297 *and dNF1-KO cells grown in serum free media (n=6; p values obtained using a two-way*  
298 *ANOVA with Tukey for multiple comparisons). (F) CQ and bafilomycin A1 (B-A1) increased*  
299 *annexin V staining in dNF1-KO cells relative to S2R+ controls after 48 h in serum-free media*  
300 *(n=4-6; p values obtained using a two-way ANOVA with Tukey for multiple comparisons). In*  
301 *all cases, bars represent the mean and error bars indicate standard deviation.*

302

303 **Both early- and late-stage autophagy genes have a synthetic lethal interaction with**  
304 **dNF1, which can be targeted with other autophagy inhibitors**

305 Autophagy is a complex process involving multiple stages and many different proteins (**Figure**  
306 **4A**). To determine whether more specific targeting of autophagy components would result in  
307 a greater selective effect in *dNF1-KO* cells, we performed an additional VDA screen to assess  
308 for synthetic lethal interactions between *dNF1* and 29 key autophagy genes (in addition to  
309 *Atg8b*) using S2R+ and *dNF1-KO* cells (all 29 genes screened are shown in **Table S3**). In

310 total, 14 genes, in addition to the previously identified *Atg8b*, were found to significantly reduce  
311 dNF1-KO viability by >10% relative to controls (**Figure 4B**). Interestingly, these 14 genes are  
312 implicated across all stages of the autophagy pathway (**Figure 4A**, genes shown in red).  
313 Therefore, we tested drugs targeting specific aspects of the autophagy pathway in dNF1-KO  
314 cells, including MRT68921 (an early-stage autophagy inhibitor of ULK1 and ULK2), VPS34-  
315 IN1 (a potent early-stage autophagy inhibitor of the PI3K-III complex), NSC 185058 (a mid-  
316 stage inhibitor of *Atg4b*), CA5f (a late-stage inhibitor of autophagic flux), and obatoclax (a late-  
317 stage autophagy inhibitor) (**Figure 4A**). In general, the autophagy inhibitors showed a  
318 selective viability effect in dNF1-KO cells, except for MRT68921 and NSC 185058 (**Figure 4C-**  
319 **G**); however, none of the drugs were deemed to be more effective in selectively killing dNF1-  
320 KO cells than CQ and bafilomycin A1. CQ also has the advantage of being FDA-approved.  
321 Therefore, although targeting autophagy at various stages of the pathway appears to have  
322 selective viability effects in dNF1-KO cells, the late-stage autophagy inhibitor CQ could provide  
323 the greatest potential for use in the clinic to treat NF1.

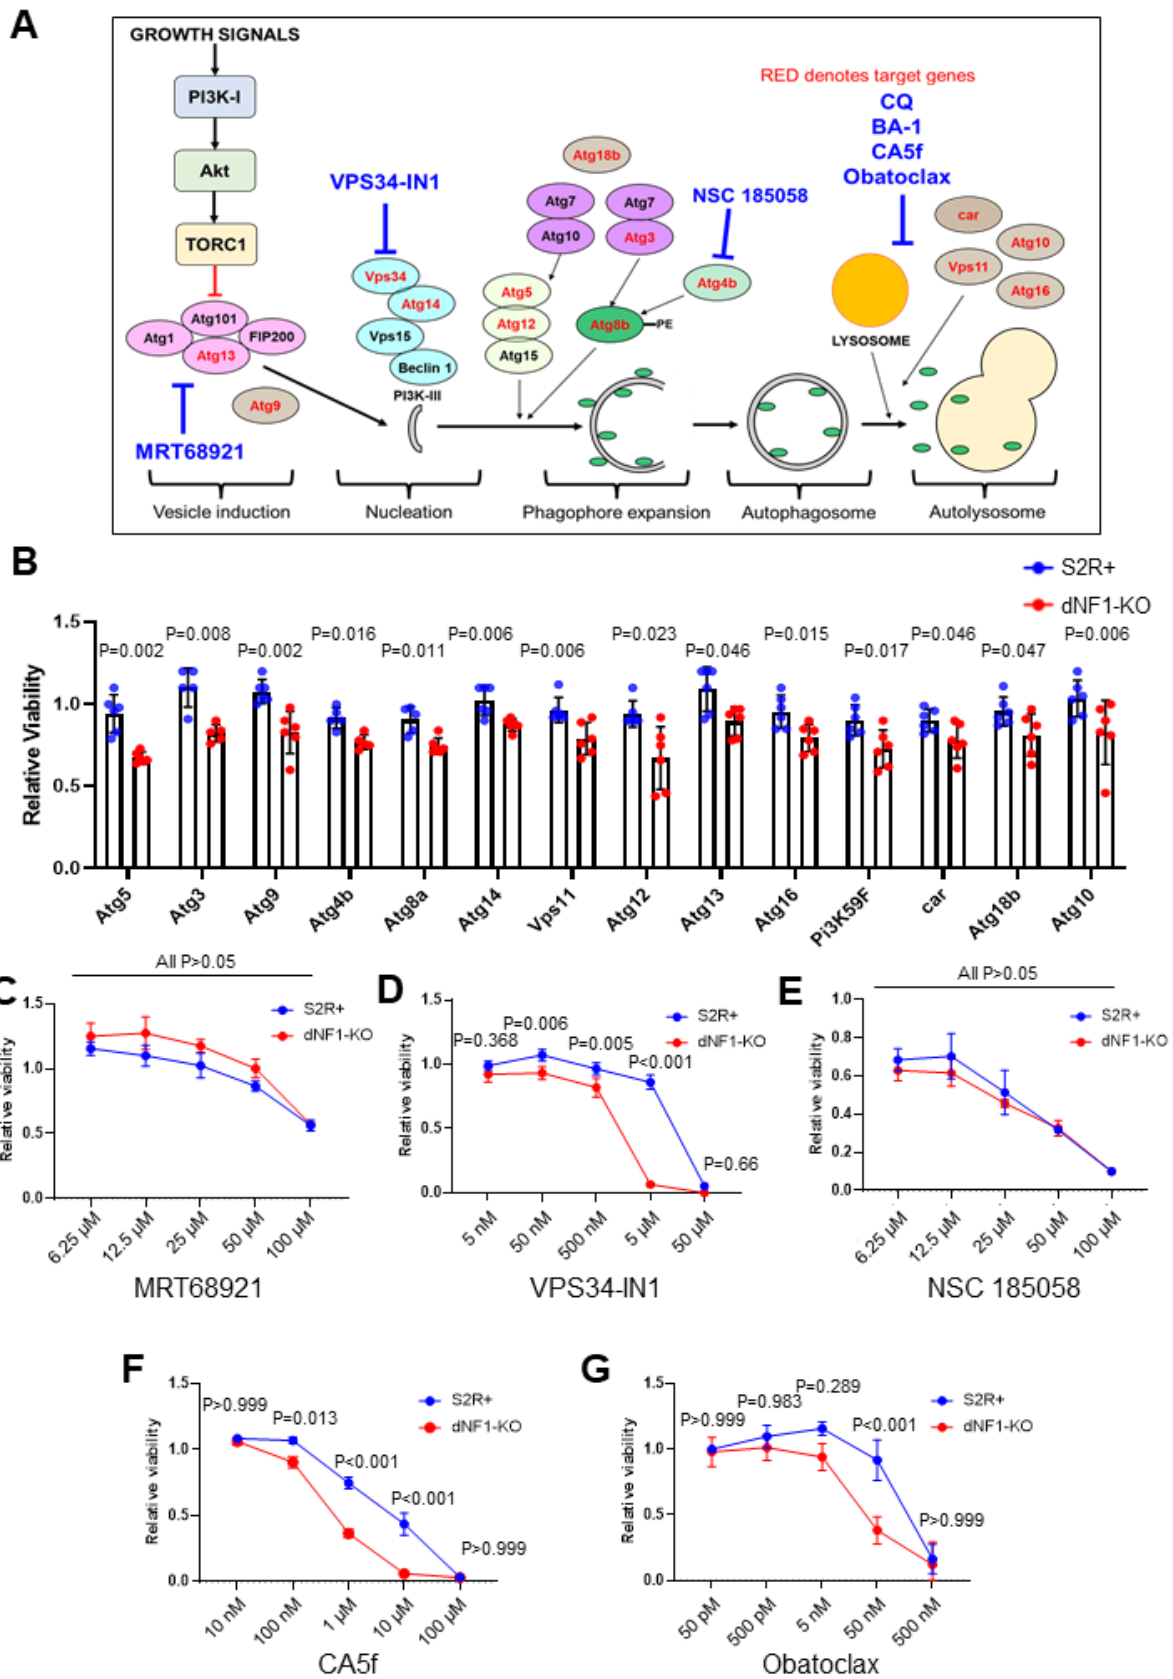

325 **Figure 4. Both early- and late-stage autophagy genes have a synthetic lethal interaction**  
326 **with dNF1, which can be targeted with other autophagy-inhibitors. (A)** Diagrammatic  
327 representation of the autophagy pathway in *Drosophila*. The genes found to have a synthetic  
328 lethal interaction with dNF1 are shown in red. Drugs used to target each stage of the pathway  
329 in subsequent viability assays are shown in blue. **(B)** VDA assays performed for 30 autophagy-  
330 related genes, with two shRNAs per gene, in S2R+ (blue) and dNF1-KO (red) cells. Shown is  
331 the most effective shRNA from each of the 14 genes that reduced dNF1-KO viability by >10%  
332 relative to S2R+ controls, ranked in order of effect. **(C-G)** Testing autophagy inhibitors for  
333 differences in cell viability between dNF1-KO and S2R+ cells after 48 h in serum-free media  
334 as measured using the CellTiter Glo assays ( $n=4$ ;  $p$  values obtained using a two-way ANOVA  
335 with Tukey for multiple comparisons). VPS34-IN1 **(D)**, CA5f **(F)**, and obatoclax **(G)** selectively  
336 reduced dNF1-KO cell viability compared to S2R+ cells in a dose-dependent manner. By  
337 contrast, MRT68921 **(C)** and NSC 185058 **(E)** did not selectively affect dNF1-KO cell viability  
338 compared to S2R+ cells. In all cases, data represents the mean and error bars indicate  
339 standard deviation.

340

#### 341 **CQ and bafilomycin A1 selectively affect NF1-deficient human cells**

342 To determine whether the selective effect of CQ and bafilomycin A1 was conserved in human  
343 cells, we tested the effects of drug treatment on a panel of human *NF1*-deficient cell lines.  
344 These included a pair of otherwise isogenic *NF1*<sup>+/-</sup> (C8) and *NF1*<sup>-/-</sup> (C23) immortalized  
345 Schwann cells generated using CRISPR/Cas9 gene editing (**Figure 1F-H**). In addition, we  
346 used two pairs of immortalized Schwann cell lines (pair 1: ipnNF95.11C (*NF1*<sup>+/-</sup>) and  
347 ipnNF95.11b 'C' (*NF1*<sup>-/-</sup>) and pair 2: ipnNF09.4 (*NF1*<sup>+/-</sup>) and ipnNF05.5 (*NF1*<sup>-/-</sup>)) derived from  
348 plexiform neurofibromas (22). Autophagic flux was significantly higher in *NF1*<sup>-/-</sup> cells  
349 (ipnNF95.11b 'C' and ipnNF05.5) relative to *NF1*<sup>+/-</sup> controls (ipnNF95.11C and ipnNF09.4), with  
350 a similar but not significant effect also observed in the CRISPR-generated *NF1*<sup>-/-</sup> (C23) cells  
351 compared to *NF1*<sup>+/-</sup> (C8) controls (**Figure 5A-C**). Similarly, lysosomal activation was increased

352 in ipNF95.11b 'C' cells compared to ipnNF95.11C controls, further indicating an increase in  
353 baseline autophagy levels (**Figure S5**). Additionally, lysosomal activation was inhibited by CQ  
354 and bafilomycin A1 in both *NF1*<sup>+/-</sup> and *NF1*<sup>-/-</sup> cells (**Figure S5**).

355

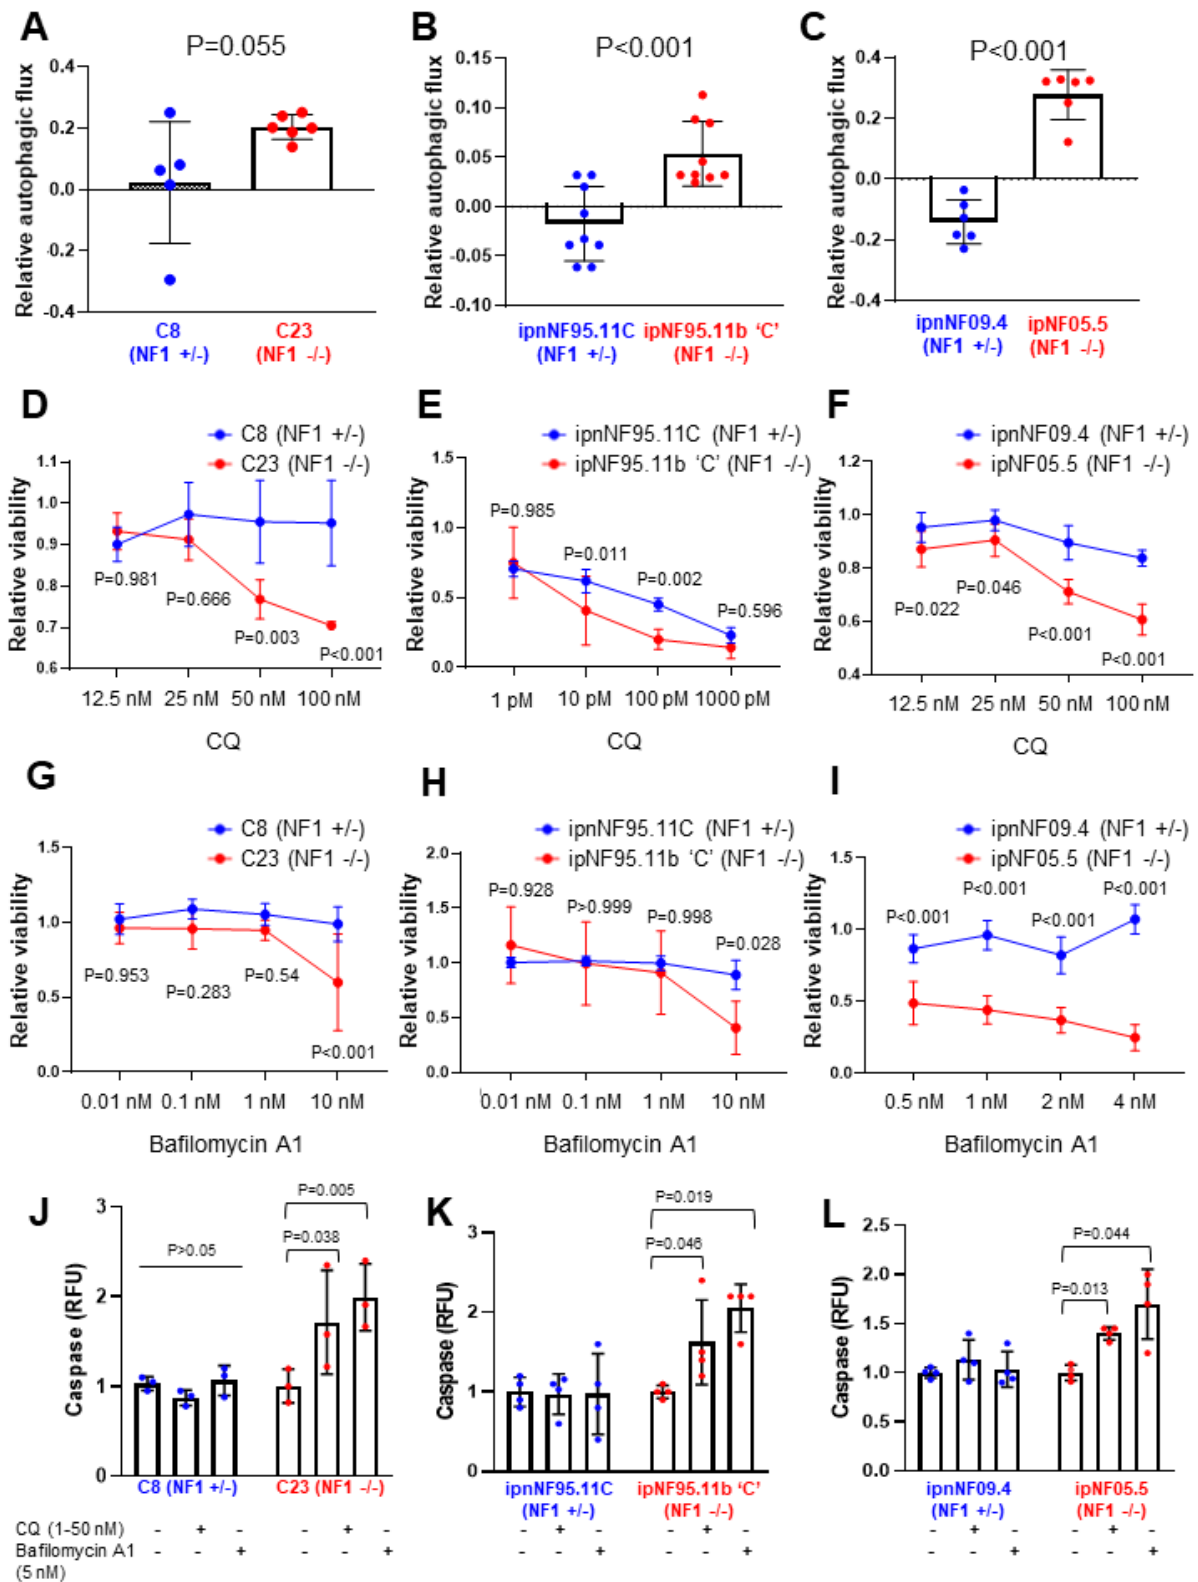

357 **Figure 5. CQ and bafilomycin A1 selectively affect NF1-deficient human cells. (A-C)**  
358 *Autophagic flux was increased in C23, ipNF95.11b 'C', and ipNF05.5 NF1<sup>-/-</sup> cells compared to*  
359 *heterozygous controls after 4 h of lysosomal inhibition with CQ (10  $\mu$ M) in serum-free media*  
360 *(n=5–9; p values obtained using the two-tailed, unpaired, Student's t-test). CQ significantly*  
361 *reduced NF1<sup>-/-</sup> cell viability relative to NF1<sup>+/-</sup> controls at varying doses in C8/C23 cells (D),*  
362 *ipnNF95.11C/ipNF95.11b 'C' cells (E), and ipnNF09.4/ipNF05.5 cells (F) after 48 h in serum-*  
363 *free media as measured with CellTiter Glo assays (n=3-4; p values obtained using a two-way*  
364 *ANOVA with Tukey for multiple comparisons). (G-I) Bafilomycin A1 significantly reduced NF1<sup>-</sup>*  
365 *cell viability relative to NF1<sup>+/-</sup> controls at varying doses in C8/C23 cells (G),*  
366 *ipnNF95.11C/ipNF95.11b 'C' cells (H), and ipnNF09.4/ipNF05.5 cells (I) after 48 h in serum-*  
367 *free media as measured with CellTiter Glo assays (n=3-4; p values obtained using a two-way*  
368 *ANOVA with Tukey for multiple comparisons). (J-L) We observed an increase in caspase*  
369 *activation in NF1<sup>-/-</sup> cells relative to NF1<sup>+/-</sup> control cells when treated with CQ or bafilomycin A1*  
370 *for 48 h in serum-free media: (J), C8 and C23 cells (50 and 5 nM, respectively), (K)*  
371 *ipnNF95.11C/ipNF95.11b 'C' cells (1 and 5 nM, respectively), and (L) ipnNF09.4/ipNF05.5*  
372 *cells (50 and 5 nM, respectively) (n=4; p values obtained using a two-way ANOVA with Tukey*  
373 *for multiple comparisons). In all cases, bars represent the mean and error bars indicate*  
374 *standard deviation.*

375

376 Both CQ and bafilomycin A1 resulted in a significantly greater reduction in the viability of  
377 homozygous NF1<sup>-/-</sup> deficient cells compared to heterozygous NF1<sup>+/-</sup> controls after 48 h of  
378 treatment under serum-free media conditions, as measured with the CellTiter-Glo and  
379 caspase assays (**Figure 5D-L**), demonstrating that the selective effects are conserved  
380 between *Drosophila* and human systems. Although the effective dose of bafilomycin A1 in  
381 *Drosophila* cells appears to be very low, human cells were affected by doses in the range of  
382 the previously demonstrated IC<sub>50</sub> of 0.44 nM in human cells (30).

383

384 We also tested the additional five autophagy inhibitors in the two patient *NF1*-deficient cell  
385 lines (**Figure S6**); however, no drug showed a consistent effect across the panel of human  
386 cell lines that was comparable to that of CQ and bafilomycin A1, further highlighting the  
387 reproducibility of our *Drosophila* model system.

388

389 Together, these results demonstrate that *NF1*-deficient cells have a vulnerability to disruption  
390 of the autophagy pathway, which is conserved and reproducible with multiple inhibitors  
391 between *Drosophila* and human Schwann cells derived from *NF1*-associated tumors. Not only  
392 does autophagy represent a promising pathway for targeting *NF1*-associated tumors, but we  
393 identified CQ as a candidate drug for the potential treatment of *NF1* tumors.

394

#### 395 **CQ affects survival in a *Drosophila in vivo NF1* mutant model**

396 As CQ is a well-tolerated FDA-approved therapeutic, and showed a significant effect on *dNF1*-  
397 KO and human *NF1*<sup>-/-</sup> cell viability, we chose to take this drug forward to determine synthetic  
398 lethality *in vivo*. *Drosophila dNf1* mutant flies show defective Ras signaling, which result in a  
399 number of neurobehavioral phenotypes (31-35). For this study, we generated a novel *dNf1*  
400 null mutant fly using CRISPR gene editing: *dNf1*<sup>C1</sup> (delAT162-163) (**Figure 6A**). Western blots  
401 using lysates prepared from adult heads from *dNf1*<sup>C1</sup> homozygous mutants showed no  
402 detectable expression of neurofibromin (**Figure 6B**). In addition, ELISAs showed a 4-fold  
403 increase in pERK/ERK of *dNf1*<sup>C1</sup> mutants compared to the WT parental line (**Figure 6C**).

404

405 To determine whether CQ affects survival in *NF1*-deficient *Drosophila*, we took two  
406 approaches. Firstly, we compared the effect of CQ on *dNf1*<sup>C1</sup> homozygous null mutant flies,  
407 the WT parental line, and *dNf1*<sup>C1</sup> with re-expression of *dNf1* from a *UAS-dNF1* transgene  
408 driven with a pan-neuronal (*nSyb-Gal4*) driver (*dNf1*<sup>C1</sup> + *nSyb-Gal4*>*UAS-dNf1*). CQ resulted  
409 in increased lethality of *dNf1*<sup>C1</sup> mutants compared to the WT control in a dose-dependent



410 manner (**Figure 6D, Figure S7**). Furthermore, we were able to rescue the CQ sensitivity of  
411 *dNf1<sup>C1</sup>* mutant flies by re-expression of dNf1 from a *UAS-dNf1* transgene (**Figure 6D**).  
412 Secondly, we tested flies with pan-neuronal RNAi knock down of dNf1 (using *nSyb-Gal4*)  
413 compared to a landing site control on food containing CQ (35 mM). Flies with *dNf1* RNAi  
414 knockdown, showed significantly reduced survival time on CQ compared to CQ-treated  
415 landing site control flies, and untreated flies, phenocopying the effects seen in *dNf1<sup>C1</sup>* mutant  
416 flies (**Figure 6E**). Together, these results demonstrate that *dNf1*-deficient flies have  
417 vulnerability to disruption of the autophagy pathway, as shown to be conserved and  
418 reproducible in *Drosophila* dNF1-KO cells and human Schwann cells derived from NF1-  
419 associated tumors. This further highlights the autophagy pathway as a target for the potential  
420 treatment of NF1-associated tumors, with CQ as a candidate drug.

421

#### 422 **CQ reduced NF1-deficient MPNST tumor xenograft growth *in vivo***

423 In order to test the effects of CQ *in vivo* in a mammalian model, we used the ST88-14 *NF1<sup>-/-</sup>*  
424 MPNST xenograft mouse model. Although some NF1 PN tumor cells have been shown to  
425 form xenograft tumors, they are very slow growing and require interactions with the tumor  
426 microenvironment (36). Therefore, we first assessed whether CQ selectively killed ST88-14  
427 cells *in vitro* using the CellTiter-Glo assay and found CQ to affect cell viability at concentrations  
428 slightly higher than those showing an effect in the previously tested *NF1*-deficient Schwann  
429 cell lines (**Figure 6F** compared to **Figure 5D-F**). In addition, we found that the ST88-14 cells  
430 were more sensitive to CQ than the C8 heterozygous NF1 Schwann cell line (**Figure 6F**).

431

432 In mice implanted with ST88-14 *NF1<sup>-/-</sup>* xenografts, treatment with CQ (50 mg/kg in saline,  
433 intraperitoneally, three times per week) or selumetinib (25 mg/kg in saline, oral gavage, three  
434 times per week) once the tumors had started to grow, resulted in a significant reduction in  
435 tumor xenograft growth over a period of 3 weeks in comparison to vehicle-treated controls

436 **(Figure 6G)**. Furthermore, there was a significant reduction in tumor xenograft growth in CQ-  
437 treated mice in comparison to selumetinib-treated mice, indicating CQ to have a superior effect  
438 on *NF1*-deficient tumor xenograft growth. CQ and selumetinib treatment were found to have  
439 no toxicity effects in these mice (**Figure S8**), which was also assessed in a prior study on  
440 C57BL/6 mice (data not shown).

441

442 CQ and selumetinib were found to induce *NF1*-deficient cell apoptosis *in vitro*; therefore, we  
443 used western blotting to assess the cleavage of a key apoptosis protein, PARP, in xenografts  
444 from control, CQ, and selumetinib-treated mice. We found a significant increase in the 24 kDa  
445 fragment of cleaved PARP/PARP in xenografts from CQ-treated mice (**Figure 6H-I**), indicating  
446 that CQ was causing cell apoptosis in the *NF1* xenografts, thus slowing tumor growth. This  
447 increase was also observed in selumetinib-treated mice, although the difference was not  
448 significant.

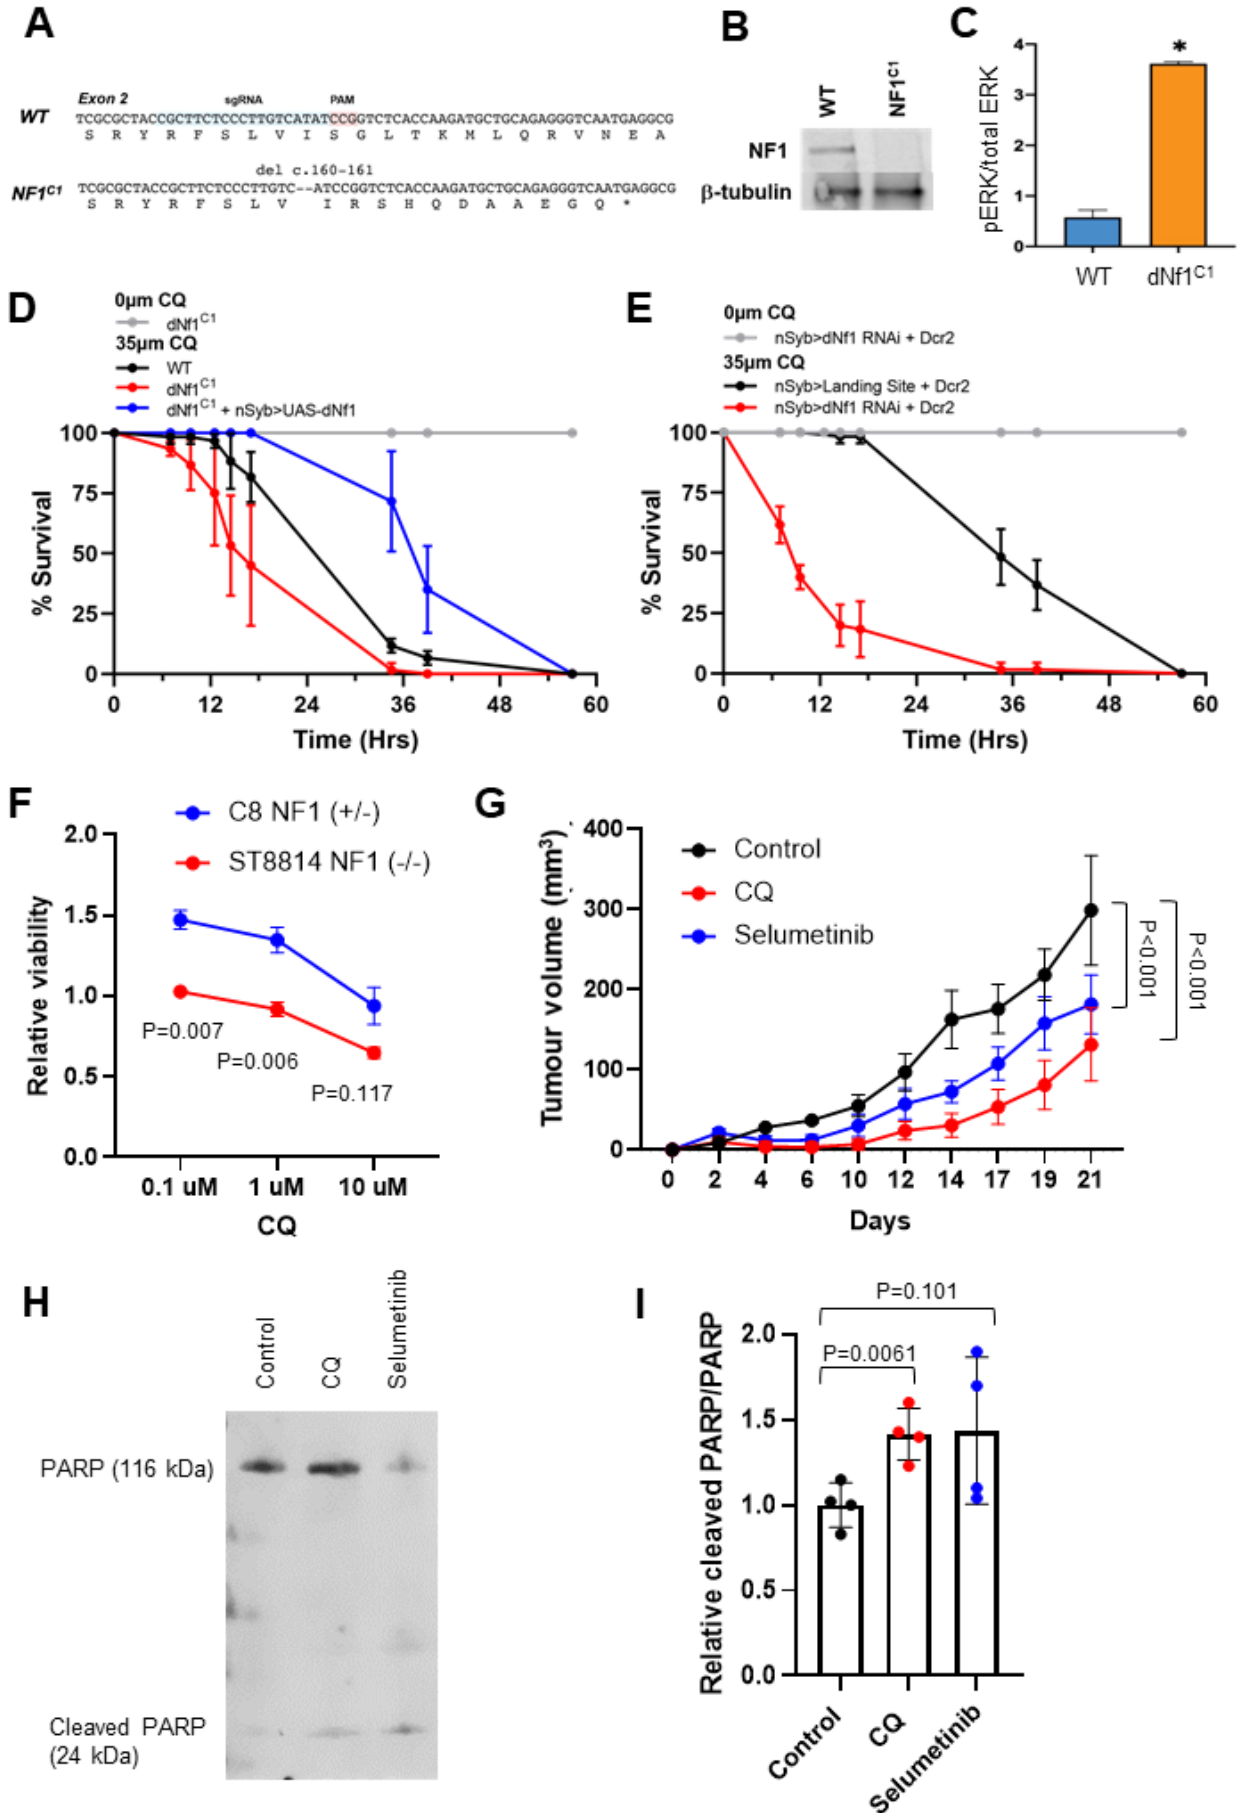

450 **Figure 6. CQ affected lethality in NF1 mutant Drosophila and reduced NF1-deficient**  
451 **MPNST tumor xenograft growth in vivo. (A)** We generated a novel *dNf1* null mutants using  
452 CRISPR gene editing: *dNf1<sup>C1</sup>* (*dNF1 delAT162-163*). **(B)** Western blots of anti-*dNf1*  
453 immunoprecipitates from lysates prepared from adult heads from CRISPR mutants showed  
454 no expression of *Nf1* in *dNf1<sup>C1</sup>* homozygous animals **(C)** ELISA for pERK/ERK showed a 4-  
455 fold increase in pERK/ERK of *dNf1<sup>C1</sup>* mutants compared to WT flies. Error bars indicate the  
456 standard deviation between duplicate samples. A paired, two-tailed t-test was performed to  
457 determine significance; \**P* < 0.05. **(D)** Addition of CQ to 35  $\mu$ M to food resulted in increased  
458 lethality of *dNf1<sup>C1</sup>* mutants compared to WT flies (*n*=3, 20 flies per replicate). The sensitivity of  
459 *dNf1* mutant flies to CQ was rescued by re-expression of *dNf1* from a UAS-*dNF1* transgene  
460 using the *nSyb-Gal4* driver (*n*=3, 20 flies per replicate) **(E)** *dNf1* RNAi knockdown flies (*nSyb-*  
461 *Gal4>v109637*) show a similarly reduced survival time when cultured on food with 35  $\mu$ M CQ  
462 compared to control flies (*nSyb-Gal4>VIE-260B v60100*). *n*=3, 20 flies per replicate. **(F)** CQ  
463 significantly reduced *NF1<sup>-/-</sup>* mutant cell viability relative to C8 *NF1<sup>+/-</sup>* controls at varying doses  
464 in ST88-14 cells after 48 h in serum free media, as measured with the CellTiter Glo assay  
465 (*n*=9; *P* values obtained using a two-way ANOVA with Tukey for multiple comparisons). **(G)** In  
466 mice implanted with ST88-14 *NF1<sup>-/-</sup>* xenografts, intraperitoneal injections of CQ (50 mg/kg, 3x  
467 weekly) or oral gavage with selumetinib (25 mg/kg, 3x weekly) significantly slowed tumor  
468 growth compared to vehicle-treated controls. Furthermore, there was a significant reduction  
469 in tumor growth in CQ-treated mice compared to selumetinib-treated mice (*n*=6; *P* value  
470 obtained using a two-way ANOVA). **(H-I)** Following extraction of the xenografts, western  
471 blotting revealed the increased protein expression of the 24 kDa fragment of cleaved PARP  
472 relative to PARP in CQ-treated mice in comparison to controls (*n*=4; *P* values obtained using  
473 the unpaired Student's t-test).

474

475

476

477 **Selumetinib enhances to viability effect of CQ and bafilomycin A1**

478 Selumetinib, a MEK1/2 inhibitor, is currently the only FDA-approved drug for the treatment of  
479 tumors associated with neurofibromatosis type 1 (37). We treated S2R+ and dNF1-KO cells  
480 with selumetinib (10  $\mu$ M) with and without CQ (1 mM) or bafilomycin A1 (100 pM) for 48 h in  
481 serum-free media and performed CellTiter-Glo assays to measure cell viability (**Figure 7A**).  
482 When selumetinib was combined with CQ or bafilomycin A1, we saw a further reduction in  
483 dNF1-KO, but not S2R+ viability relative to the CQ/bafilomycin A1 only, indicating that  
484 selumetinib enhances the effects of CQ/bafilomycin A1 on dNF1-KO cell viability.

485

486 Similarly, in C8/C23, ipnNF9511.C/ipNF95.11b 'C', and ipnNF09.4/ipNF05.5 cell lines,  
487 selumetinib significantly enhanced the reduced viability effect of CQ in *NF1*<sup>-/-</sup>, but not *NF1*<sup>+/-</sup>  
488 cells (**Figure 7B-D**). Therefore, combined treatment of CQ and selumetinib had a greater  
489 impact in *NF1*-deficient cell viability compared to either drug alone. In addition, selumetinib  
490 significantly enhanced the viability effect of bafilomycin A1 in patient *NF1*<sup>-/-</sup> (ipNF95.11b 'C'  
491 and ipNF05.5) but not *NF1*<sup>+/-</sup> cells (ipnNF9511.C and ipnNF09.4), although not in C8/C23 cells  
492 (**Figure 7B-D**).

493

494 To determine whether these combined effects were additive or synergistic, the coefficient of  
495 drug interaction (CDI) was calculated for each cell line treated with CQ + selumetinib or  
496 bafilomycin A1 + selumetinib. A CDI<1 indicates synergy, CDI=1 indicates additivity, and  
497 CDI>1 indicates antagonism. We observed a relatively strong synergistic effect with CQ +  
498 selumetinib in C23 cells, and with bafilomycin A1 + selumetinib in ipNF05.5 cells. Weaker  
499 evidence of synergy was also seen in other cell lines (**Figure 7E**).

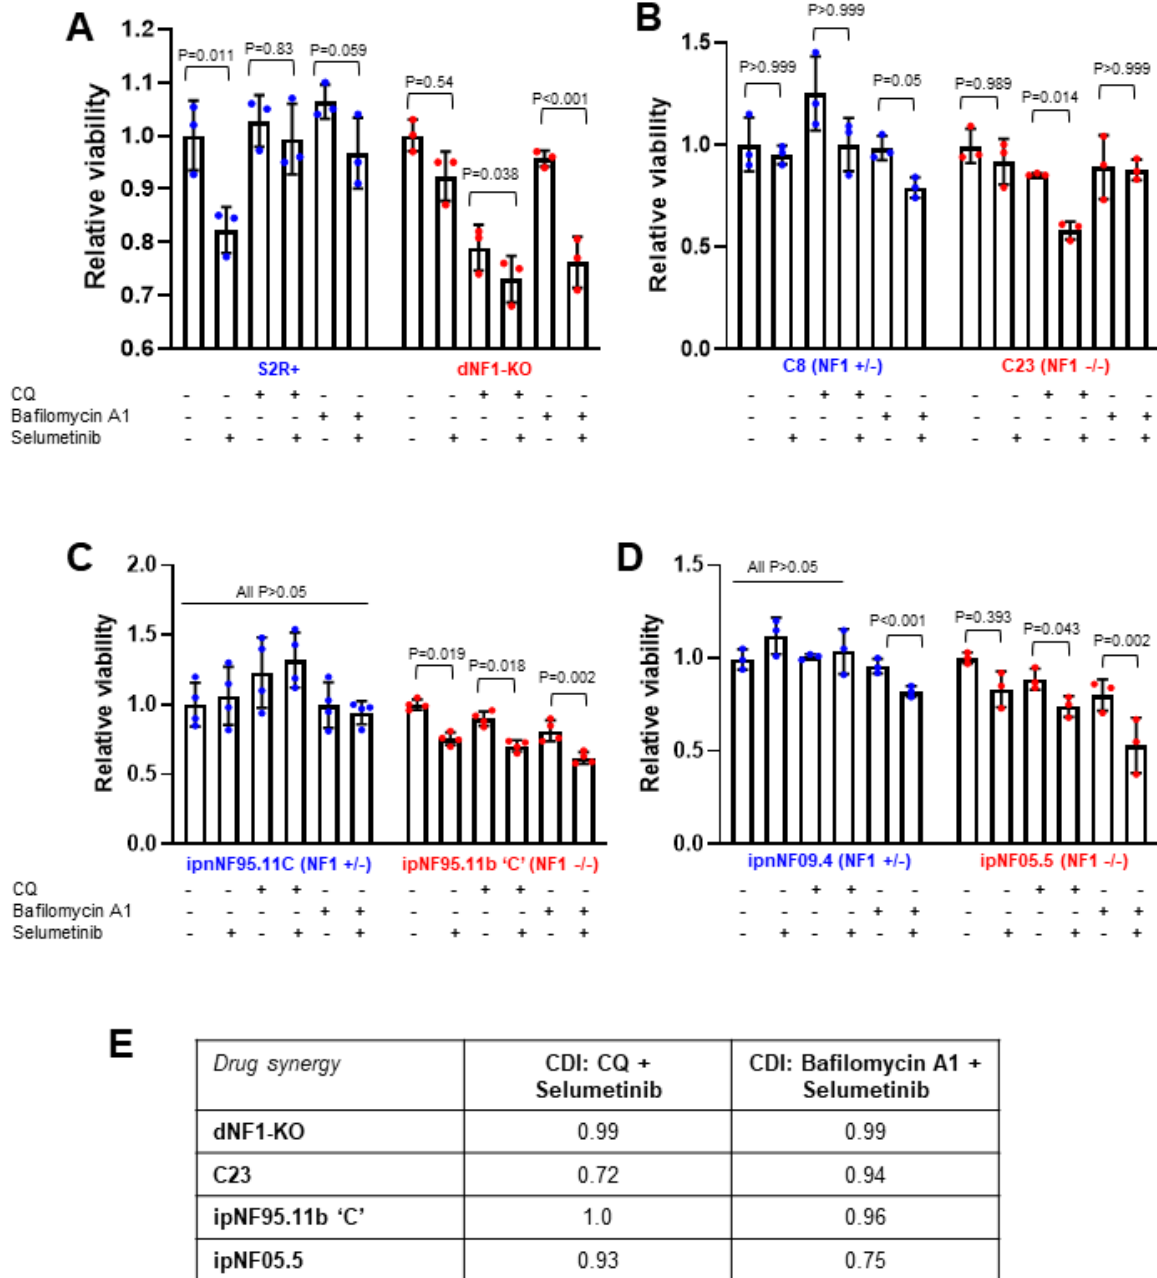

501 **Figure 7. Combined effect of selumetinib with CQ or bafilomycin A1 on NF1-deficient**  
502 **cell viability. (A)** S2R+ and dNF1-KO cells were treated with 0  $\mu$ M or 10  $\mu$ M selumetinib  
503 combined with CQ (1 mM) or bafilomycin A1 (10 pM). Alone, selumetinib significantly reduced  
504 the viability of S2R+ but not dNF1-KO cells after 48 h in serum-free media, as measured using  
505 CellTiter Glo assays. In combination with CQ or bafilomycin A1, selumetinib resulted in a  
506 significantly greater reduction in dNF1-KO cell viability compared to CQ alone, which was not  
507 observed in S2R+ cells ( $n=3$ ;  $p$  values obtained using a two-way ANOVA with Tukey for  
508 multiple comparisons). **(B)** In a similar experiment in human cell lines, selumetinib alone had  
509 no effect on the viability of C8, C23 (10  $\mu$ M), ipnNF95.11C (5  $\mu$ M), ipnNF09.4, and ipNF05.5  
510 (10  $\mu$ M) **(B-D)**; however, it did significantly decrease viability of ipNF95.11b 'C' NF1<sup>-/-</sup> (5  $\mu$ M)  
511 **(C)**. Similar to observations in *Drosophila* cells, the effect of CQ was enhanced when  
512 combined with selumetinib in all three NF1<sup>-/-</sup> cell lines (50 nM, 100 pM, and 50 nM,  
513 respectively), whereas the effect of bafilomycin A1 (100 pM, 1 nM, and 1 nM, respectively)  
514 was enhanced by selumetinib only in the patient-derived NF1-deficient cell lines (ipNF95.11b  
515 'C' and ipNF05.5). ( $n=3-4$ ;  $p$  values obtained using a two-way ANOVA with Tukey for multiple  
516 comparisons). In all cases, bars represent the mean and error bars indicate standard  
517 deviation. **(E)** Drug synergy between CQ + selumetinib or bafilomycin A1 + selumetinib was  
518 calculated using the coefficient of drug interaction (CDI).  $CDI < 1$  indicates synergy (with  
519  $CDI < 0.7$  indicating a strong synergistic effect),  $CDI = 1$  indicates additivity, and  $CDI > 1$  indicates  
520 antagonism. In this case, drug pairs were classed as synergistic if  $CDI < 0.95$ .

521

522

## 523 DISCUSSION

524 In this study, we used a *Drosophila* cell culture model of NF1 to identify new potential  
525 therapeutic targets and subsequently candidate drugs for the selective killing of *NF1*-deficient  
526 cells. Using genetic screening of *Drosophila* cells, we identified 54 candidate synthetic lethal  
527 genes that when knocked down resulted in the death of *NF1*-deficient cells without impacting  
528 the viability of wild-type, healthy cells. Of these genes, 85% (46/54) were validated in  
529 secondary assays, indicating the high quality of the screen results. A key outcome from this  
530 screen was the identification of *Atg8b* as a synthetic lethal partner of *NF1*. *Atg8b* (human  
531 ortholog: *GABARAP*) is an autophagy-related protein located in the autophagosome.  
532 Autophagy is the process where damaged organelles and unfolded proteins are sequestered  
533 into autophagosomes in the cytoplasm, which then undergo fusion with lysosomes  
534 (autolysosomes), resulting in degradation of the intracellular components (38). This is  
535 important in the regulation of cell growth, maturation, and death.

536

537 In cancer, autophagy is reported to take on two opposing roles: 1) degradation of damaged  
538 organelles and recycling of macromolecules to maintain a stable cellular environment, which  
539 prevents the formation of tumors (39); and 2) aiding in cancer cell survival in response to  
540 growth-limiting conditions, contributing to tumorigenesis (40). Furthermore, autophagy has  
541 been widely reported to promote cancer cell survival through a drug resistance mechanism  
542 (40, 41). Therefore, targeting the autophagy pathway is a potential therapeutic option in the  
543 treatment of cancer.

544

545 Autophagy is a complex process involving many different genes. In addition to *Atg8b*, *Uba1*  
546 was also identified in the screen, which is also linked to autophagy (42). While the selective  
547 effects of inhibiting *Atg8b* and *Uba1* were consistent and reproducible in secondary assays, it  
548 was surprising that more autophagy linked genes were not identified in our screens. Upon



549 further investigation, we found that approximately half of the 30 autophagy genes tested with  
550 low throughput assays showed the selective effects observed with *Atg8b*. These genes have  
551 roles from early-stage vesicle induction to late-stage fusion of the autophagosome and  
552 lysosome. These results suggest that the entire autophagy pathway is dysregulated in *dNF1*-  
553 KO cells, and it is likely that other autophagy genes were missed by the screen due to  
554 ineffective RNAi reagents or noise.

555

556 Interestingly, *Atg5*, which is involved in the induction of autophagy via autophagic vesicle  
557 formation, was found to have the most significant synthetic lethal interaction with *NF1*.  
558 Previous studies have implicated ATG5 upregulation in RAS-induced autophagy and  
559 malignant cell transformation (43, 44). However, at present, there are no commercially  
560 available inhibitors of ATG5. Further studies are required to determine the exact autophagy  
561 genes that are dysregulated in our panel of human *NF1*-deficient cell lines.

562

563 In total, we assessed seven autophagy inhibitors, and all reproduced the selective effects in  
564 *NF1*-deficient cells. However, there was some variation in effects with some drugs not being  
565 effective across all cell lines tested. CQ appears to be the most promising of the drugs that  
566 we tested for clinical application. It is already approved for clinical use and produced the most  
567 consistent and robust effects across the different *NF1* cell models that we tested. CQ is a  
568 widely used anti-malarial that functions to inhibit autophagy by blocking the binding of  
569 autophagosomes to lysosomes by diffusing into the lysosomes and altering the acidic  
570 environment, thereby inhibiting autophagic lysosomal degradation (25). Previous studies have  
571 shown that CQ has anti-tumor properties in several types of cancer, including glioblastoma  
572 (45, 46), hepatocellular carcinoma (47), prostate cancer (48), breast cancer (49), and  
573 pancreatic cancer (50). In addition, a recent study reported that the expression of  
574 metalloproteinase 1 (MMP1) was down-regulated in *NF1*-deficient fibroblasts, with a further  
575 reduction associated with lysosomal degradation of MMP1. Interestingly, treatment of *NF1*-

576 deficient cells with CQ restored MMP1 expression via two mechanisms: activation of the  
577 AHR/ERK pathway to enhance the mRNA and protein expression of MMP1, and inhibition of  
578 the lysosomal degradation of MMP1 (51). Although this study did not assess whether  
579 autophagy was dysregulated in the *NF1*-deficient fibroblasts and did not assess Schwann cells  
580 or cells derived from *NF1* tumors, it does highlight the therapeutic potential of autophagy  
581 inhibition. Similarly, we found that CQ significantly reduced *dNF1*-KO cell viability relative to  
582 wild-type S2R+ cells across a range of concentrations under conditions where autophagy is  
583 induced (serum starvation of cells and *NF1* deficiency). This effect of CQ was conserved  
584 across a panel of three human *NF1*-deficient cell lines, two of which were derived from  
585 neurofibromas from *NF1* patients. Furthermore, CQ altered the survival of *dNf1*-deficient  
586 *Drosophila in vivo* and reduced the growth of *NF1*-mutant xenografts in mice to an even  
587 greater extent than selumetinib. The doses of CQ and selumetinib administered to the mice  
588 were deemed non-toxic, as has been widely reported previously (52, 53). Through the  
589 inhibition of autophagy with CQ, we observed an increased level of apoptosis in the CQ-  
590 treated xenografts, as assessed with the levels of cleaved PARP. Therefore, CQ shows great  
591 potential as a therapeutic agent for *NF1*-associated tumors.

592

593 While there is a vast array of evidence for the efficacy and safety of CQ, the underlying  
594 mechanisms of the tumor suppressive actions of CQ remain to be determined. One potential  
595 mechanism is that under starvation conditions, such as those used in this study (i.e. serum  
596 starvation), a reduction in glucose transport results in a release of mTOR inhibition of the ULK1  
597 complex, inducing vesicle nucleation and facilitating the process of autophagy. Inhibition of  
598 the lysosome using CQ has been shown to inhibit tumor growth and induce tumor cell death  
599 *in vitro* (54, 55). We speculate that *NF1*-deficient cells are more susceptible to autophagy  
600 inhibition with CQ because the baseline levels of autophagy are higher. *RAS* has previously  
601 been shown to regulate autophagic flux (56). In addition, cancers associated with *RAS*  
602 mutations have been reported to be dependent on autophagy, although this appears to be

603 tumor cell line dependent (57, 58). Therefore, cancers with aberrant RAS activity can be more  
604 susceptible to autophagy inhibition with CQ. Neurofibromin functions as a RASGAP (GTPase-  
605 activating protein), which facilitates RAS inactivation by enabling its GTPase activity (59). In  
606 *NF1*-associated tumors, neurofibromin expression is downregulated or absent, resulting in  
607 aberrant RAS activity and upregulation of the PI3K/Akt/mTORC1 pathway. Therefore,  
608 aberrant RAS activity is expected to negatively regulate autophagy; however, RAS is  
609 implicated in many signaling pathways and so it has a multifaceted role in autophagy  
610 regulation. For example, RAS also activates the RAF1/MEK1/2/ERK and RAC1/MKK7/JNK  
611 signaling pathways, both of which are known to activate autophagy (56). Furthermore,  
612 upregulation of ATG5 and ATG7 has been implicated in RAS-induced autophagy and  
613 malignant cell transformation (43, 44). Therefore, we speculate that aberrant RAS activity in  
614 *NF1*-deficient cells results in the initiation of autophagy, and that inhibition of this pathway has  
615 anti-tumor effects. When combining our data on the effects of CQ and bafilomycin A1, we  
616 provide strong evidence for inhibition of the autophagy pathway as a target in the treatment of  
617 *NF1*-associated tumors.

618

619 Finally, we found that inhibition of autophagy with CQ and bafilomycin A1 increased the  
620 sensitivity of *NF1*-deficient cells (both dNF1-KO and human *NF1*<sup>-/-</sup> cells) to MEK1/2 inhibition  
621 with selumetinib. Selumetinib is currently the only FDA-approved drug for the treatment of  
622 tumors associated with neurofibromatosis type 1 (37). The phase 2 trial (SPRINT) for the use  
623 of selumetinib in plexiform neurofibromas reported clinically meaningful improvements in 71%  
624 of patients (13), prompting its FDA approval for patients ages 2 to 18 years with NF1 who have  
625 symptomatic, inoperable plexiform neurofibromas. However, there are toxicity effects related  
626 to long-term MEK inhibition. Interestingly, selumetinib had no selective effect in the dNF1-KO  
627 cells compared to wild-type S2R+ controls when used alone. Furthermore, we observed no  
628 difference in the phosphorylation of ERK between S2R+ and dNF1-KO cells under baseline  
629 conditions, which suggests that RAS activity levels are similar in the two cell lines. Therefore,

630 while there is extensive evidence that RAS activation leads to dependence on autophagy, it is  
631 possible that there is a second, RAS-independent, mechanism that also contributes to the  
632 selective effect of autophagy inhibition. Such a mechanism may explain why we see a  
633 combinatorial effect of autophagy inhibition and MEK1/2 inhibition. This finding is in line with  
634 a previous study, which showed that combined inhibition of MEK1/2 plus autophagy had a  
635 synergistic anti-proliferative effect in pancreatic ductal adenocarcinoma cell lines, which  
636 display aberrant K-RAS activity, as well as patient-derived pancreatic ductal adenocarcinoma  
637 xenograft tumors in mice (60).

638

639 In conclusion, we have shown using multiple techniques, reagents, and models that inhibition  
640 of autophagy has potential as a novel therapeutic strategy for the treatment of NF1 tumors.  
641 Given the existing clinical use of CQ and the robust and conserved effects that we observe  
642 between cell culture models, this candidate drug has a high chance of successful translation  
643 to the clinic, resulting in a positive impact on NF1 patients.

644

645

## 646 **METHODS**

### 647 **Cell culture**

648 *Drosophila* Schneider (S2R+) cells, both WT and dNF1-KO, were cultured at 25°C in  
649 Schneider's media (Gibco) containing 1% antibiotic (Gibco) and 10% fetal bovine serum  
650 (Gibco). Human cell lines used include: *NF1*<sup>+/-</sup> and *NF1*<sup>-/-</sup> immortalized human Schwann cell  
651 (SC) lines, derived from the ipn02.3 2λ cell line using CRISPR/Cas9 gene editing as described  
652 below; two pairs of immortalized human SC lines derived from plexiform neurofibromas from  
653 NF1 patients (22), which included ipnNF95.11C (*NF1*<sup>+/-</sup>) and ipnNF95.11b 'C' (*NF1*<sup>-/-</sup>) cells  
654 (germline *NF1* mutation: c.1756delACTA), and ipnNF09.4 (*NF1*<sup>+/-</sup>) and ipnNF05.5 (*NF1*<sup>-/-</sup>) cells  
655 (germline *NF1* mutation: c.3456\_3457insA). All human cell lines were cultured at 37°C in 5%  
656 CO<sub>2</sub> in DMEM media (Merck) containing 1% antibiotic (Gibco) and 10% fetal bovine serum  
657 (Gibco). For ipnNF09.4 and ipnNF05.5 cells, the media was also supplemented with 50 ng/ml  
658 neuregulin-1 (NRG-1) (Sigma).

659

### 660 **Generation of dNF1-KO *Drosophila* cells**

661 The dNF1-KO cell line was generated using methods described previously (19, 61). WT S2R+  
662 cells were co-transfected with the pI018 plasmid to express Cas9 and the sgRNA  
663 (CGCTTCTCCCTTGTCATATC) and pAct-GFP plasmid to mark transfected cells. Five days  
664 after transfection, individual cells with the highest 15% GFP signal were isolated and seeded  
665 into wells of 96-well plates using FACS. Single cells were cultured using conditioned media  
666 for approximately 3 weeks. DNA was then extracted from each candidate cell population and  
667 assessed using HRMA to identify those carrying mutations at the sgRNA target site. Positive  
668 candidates were then sequenced to confirm frame-shift mutations were present in each *NF1*  
669 allele (**Figure 1A**).

670

### 671 **Generation of *NF1*-deficient human Schwann cell lines using CRISPR-Cas9**

672 The wild-type human hTERT-immortalized Schwann cell line (hTERT ipn02.3 2λ) was a gift  
673 from Dr. Peggy Wallace, University of Florida (22). CRISPR-Cas9 genome editing was  
674 performed using NF1-sg2 (ACACTGGAAAAATGTCTTGC), a sgRNA targeting human *NF1*  
675 exon 3 in the lentiCRISPR v2 plasmid, which was a gift from Dr. Feng Zhang (Broad Institute)  
676 (62). hTERT ipn02.3 2λ cells were transfected by electroporation using the Amaxa Basic  
677 Nucleofector Kit for Primary Mammalian Fibroblasts (Lonza) and the program U-023,  
678 according to the manufacturer's instructions. After 48 h of selection on puromycin (1 μg/ml) in  
679 DMEM/10% FBS, cells were re-plated in to allow single clone isolation. Genotyping of selected  
680 single clones was performed using PCR using primers NF1-exon3-FOR  
681 (CCCCAATTCAAGATTCTGGT) and NF1-exon3-REV (ATCGCACTCTCCACAACCTC). PCR  
682 products were treated with ExoSAP (Affymetrix) and sequenced using NF1-exon3-SEQ  
683 (TGCCATTTCTGTTTGCCTTA).

684

### 685 **Synthetic lethal screen**

686 Screens were performed using wild-type S2R+ or dNF1-KO cells using the genome-wide RNAi  
687 library from the Sheffield RNAi Screening Facility. In total, 10,000 cells were seeded into each  
688 library well in 10 μl serum-free Schneider's *Drosophila* media. Plates were then incubated at  
689 room temperature for 45 minutes before addition of 35 μl media with 10% FBS. Libraries were  
690 incubated at 25°C for 5 days before CellTiter-Glo assays (Promega) were performed. Screens  
691 were performed in triplicate in each cell line (**Figure S3**).

692

693 Data were analyzed by first normalizing all values to the median of each row and column of  
694 the library plate to allow direct comparison between plates. Z-scores were then calculated for  
695 each RNAi reagent using the average and standard deviation of each replicate screen and  
696 correlation between replicates was used to assess the quality of screen results. Reagents  
697 were considered hits if the Z-score in at least 2/3 of replicates was below -1.5 in dNF1-KO  
698 cells and above -1.5 in S2R+ cells. We note that some assay plates were affected by position

699 effects; these were identified manually and removed from the analysis prior to correlation  
700 analysis.

701

702 Functional gene groups were determined using the in-built clustering tool in the STRING  
703 database to group genes. Functions of each group were determined manually by searching  
704 for associated GO terms or assessing annotated functions of human orthologs in cases where  
705 the *Drosophila* gene was not sufficiently annotated.

706

### 707 **Variable dose analysis (VDA)**

708 VDA is an RNAi-based method in which each cell within a population receives a different dose  
709 of shRNA (20, 63). The relative knockdown efficiency of each cell is then measured with a  
710 fluorescent reporter. On the day of transfection S2R+ and dNF1-KO cells were plated at 1 x  
711 10<sup>4</sup> cell/100 µl culture media, per well of a 96-well plate. Cells were incubated at 25°C for 40  
712 mins to allow adhesion. Cells were then transfected with 40 ng actin-GFP and 160 ng shRNA  
713 expression plasmid using 0.6 µl FuGENE® HD transfection reagent in a total volume of 10 µl.  
714 We used a positive (*thread*, an apoptosis inhibitor that induces cell death when inhibited) and  
715 negative (*white*, known to have no viability effect in these cells) shRNA on each plate for  
716 normalization of data. Plates were then sealed and incubated for 4 days at 25°C in a  
717 humidifying chamber.

718

719 Flow cytometry was used to identify GFP-positive cells (transfection efficiency). Area under  
720 an inverted cumulative distribution curve was used as a readout of relative viability, normalized  
721 to the positive and negative control. More detailed protocol and data analysis information can  
722 be found in Sierzputowska et al. (63).

723

### 724 **CellTiter-Glo assays**

725 The CellTiter-Glo assay (Promega; G7570) is a luminescent viability assay based on the  
726 quantification of ATP, which is an indicator of metabolically active cells. All cells were plated

727 in white 384-well plates at a seeding density of  $5 \times 10^3$  cells/25  $\mu$ l culture media in either  
728 complete or serum-free media. S2R+ cells were left to adhere for 40 mins at 25°C and human  
729 cells were left to adhere for 4 h at 37°C in 5% CO<sub>2</sub> before treatment. Cells were treated with  
730 250 nl per well of each drug (CQ, bafilomycin A1, and selumetinib) in PBS at varying  
731 concentrations in replicates of 5-8 using the Mosquito LV Genomics (SPT Labtech) and  
732 incubated for 48 h. The CellTiter-Glo assay was then performed according to the  
733 manufacturer's instructions, and luminescence was measured using a plate reader (TECAN  
734 Infinite M200 Pro).

735

### 736 **Autophagy assay and Caspase assay**

737 An autophagy assay kit (Abcam; ab139484) was used to measure autophagic vacuoles in live  
738 cells using a dye that selectively labels autophagic vacuoles. All cells were plated in 96-well  
739 plates in either complete or serum-free media. S2R+ cells were left to adhere for 40 mins at  
740 25°C and human cells were left to adhere for 4 h at 37°C in 5% CO<sub>2</sub> before treatment. Cells  
741 were treated with 10  $\mu$ M per well of CQ in PBS at varying concentrations and incubated for 4  
742 h. The autophagy assay was then performed according to the manufacturer's instructions, and  
743 fluorescence intensity was measured using a plate reader (TECAN Infinite M200 Pro).  
744 Autophagic flux was quantified by inhibiting lysosomal fusion with CQ and then measuring the  
745 initial rate of accumulation of autophagosomes using a fluorescent plate reader.

746

747 Caspase activity was assessed using the same plating and treatment method, except that  
748 cells were treated for 48 h, via the generic caspase activity assay kit (Abcam; ab112130) per  
749 the manufacturer's instructions. In both the autophagy and caspase assay,  
750 autophagy/caspase fluorescence was normalized to DAPI in each well.

751

### 752 **Annexin V and PI staining**

753 The Annexin V-FITC apoptosis kit (Abcam; ab14085) was used to detect apoptosis by staining  
754 of phosphatidylserine molecules that have translocated to the outside of the cell membrane.



755 Cells were co-stained with propidium iodide (PI) to detect dead cells in the population. S2R+  
756 cells were left to adhere for 40 mins at 25°C before treatment. Cells were treated with 1 µl per  
757 well of each drug (CQ, bafilomycin A1) in PBS at varying concentrations, and incubated for 48  
758 h. The annexin-V/PI assay was then performed according to the manufacturer's instructions,  
759 and fluorescence intensity was measured using flow cytometry.

760

## 761 **Western blotting**

762 Lysates from S2R+ cells, dNF-KO cells, human immortalized Schwann cells, and  
763 homogenized xenograft tissue were prepared in RIPA buffer supplemented with protease  
764 inhibitors (Complete Protease Inhibitor Cocktail, Sigma) and phosphatase inhibitors  
765 (NaF/Na<sub>3</sub>VO<sub>4</sub>/β-glycerophosphate). Lysates for testing expression of neurofibromin were  
766 resolved on NuPAGE 3–8% Tris-Acetate and for assessing levels of pERK/ERK on NuPAGE  
767 4-12% Bis-Tris protein gels. After transfer to nitrocellulose membranes, blots were processed  
768 according to the Odyssey CLx protocol (LI-COR). Antibodies used for immunoblotting: anti-  
769 *Drosophila* neurofibromin (mouse, ascites purified mAb21 and mAb30, 1:500 each), anti-  
770 human neurofibromin (mouse, Inflixion r07E, 1:1000), anti-phospho-ERK (mouse, Sigma  
771 M8159, 1:2500), total ERK (rabbit, CST 9102, 1:1000), anti-β-tubulin (mouse, Developmental  
772 Studies Hybridoma Bank E7, 1:10,000), GAPDH (rabbit, Proteintech 10494-1-AP, 1:15,000),  
773 and anti-PARP (rabbit, Cell Signaling 952, 1:1000). Secondary antibodies used were anti-  
774 mouse Alexa Fluor Plus 800 (goat, Invitrogen, A32730, 1:10,000) and anti-rabbit Alexa Fluor  
775 Plus 680 (goat, Invitrogen, A21109, 1:10,000).

776

## 777 ***Drosophila* husbandry and stocks**

778 Flies were cultured on cornmeal/agar food medium according to standard protocol and housed  
779 at 25°C.

780

781 The *Nf1<sup>C1</sup>* mutant fly line was generated by CRISPR/Cas9 gene editing (64). using the sgRNA  
782 line: *y[1] sc[\*] v[1] sev[21]; P{y[+t7.7] v[+t1.8]=TKO.GS01796}attP40* (GS01796 sgRNA  
783 sequence: CGCTTCTCCCTTGTCATATC) and a germline source of Cas9: *y[1]*  
784 *M{w[+mC]=nos-Cas9.P}ZH-2A w[\*]* (Bloomington Stock #54591). The *UAS-dNf1* transgene  
785 encodes full-length *dNf1* cDNA corresponding to the RF isoform with addition of introns 9 and  
786 10 and was previously published (65). The RNAi and landing site control lines were obtained  
787 from the Vienna *Drosophila* RNAi Center: *dNf1 RNAi* line: P{KK101909}VIE-260B (VDRC  
788 #109637) and VIE-260B (VDRC #60100). *UAS-Dicer2* was included to potentiate the RNAi  
789 effect (66): *P{w[+mC]=UAS-Dcr-2.D}10* (Bloomington: 24651). Male flies were used for all  
790 experiments.

791

## 792 **Assessing drug sensitivity in flies**

793 Flies were raised on standard fly food and kept at 25°C. For testing drugs, adult flies were  
794 transferred to Formula 4-24 Instant *Drosophila* Medium (Carolina Biological) prepared using  
795 water (control) or chloroquine (chloroquine diphosphate; Sigma C6628) in water.  
796 Concentrations of CQ tested ranged from 0-40 µM (Figure S7) and 35 µM was used for the  
797 experiments in Figure 6 D and E. For each genotype, three replicates of 20 flies were added  
798 to each condition and kept at 25°C. Flies were monitored periodically to assess lethality.  
799 Survival was reported as the percent of flies still alive at each time point.

800

## 801 **NF1 tumor xenografts**

802 All experiments were conducted in accordance with UK legislation and with local ethics  
803 committee approval (University of Exeter AWERB). Two million ST88-14 cells mixed 1:1 with  
804 Matrigel (ThermoFisher Scientific) were injected subcutaneously into the right flank of male  
805 CD-1 nude mice (Charles River Laboratories). Tumors were measured three times weekly  
806 with a caliper, and the tumor volume was calculated as follows: [(length + width) / 2] x length  
807 x width. Once the tumor diameter began to increase over two separate measurements, mice  
808 were intraperitoneally injected with either saline or CQ (50 mg/kg in saline) or received

809 selumetinib (25 mg/kg in saline) via oral gavage three times per week (n=6 mice per group).  
810 Mice were culled by cervical dislocation (Schedule 1) when the control tumor sizes reached  
811 the allowed endpoint (12 mm in diameter), and tumors were dissected. Tumors were flash  
812 frozen for further analysis.

813

814 **Competing Interest Statement:** B.E.H. is a shareholder and founding director of Quest  
815 Genetics Ltd. The remaining authors declare no competing interests.

816

### 817 **Acknowledgements**

818 This study was funded by a Medical Research Council project grant (MR/V009583/1) and a  
819 Medical Research Council Confidence in Concept (CiC) award (MC\_PC\_19037) to B.H. and  
820 NIH R21 NS096402, DOD-NFRP W81XWH-16-1-0220 and the Neurofibromatosis  
821 Therapeutic Acceleration Program (NTAP) (J.A.W.). We would also like to thank Nerve  
822 Tumours UK for their support as collaborators on the CiC award. S.J.B was supported by the  
823 Dorothy and Spiro Latsis Fellowship for NF1 Research. N.P. is an investigator of HHMI. We  
824 thank the Sheffield RNAi Screening Facility, Biomedical Sciences, University of Sheffield,  
825 supported by the Wellcome Trust (grant reference number 084757) for providing RNAi  
826 libraries.

827 **REFERENCES**

- 828 1. Evans DG, Howard E, Giblin C, Clancy T, Spencer H, Huson SM, et al. Birth incidence  
829 and prevalence of tumor-prone syndromes: estimates from a UK family genetic register  
830 service. *Am J Med Genet A*. 2010;152A(2):327-32.
- 831 2. Gutmann DH, Ferner RE, Listernick RH, Korf BR, Wolters PL, Johnson KJ.  
832 Neurofibromatosis type 1. *Nat Rev Dis Primers*. 2017;3:17004.
- 833 3. Lin AL, Gutmann DH. Advances in the treatment of neurofibromatosis-associated  
834 tumours. *Nat Rev Clin Oncol*. 2013;10(11):616-24.
- 835 4. Rasmussen SA, Yang Q, Friedman JM. Mortality in neurofibromatosis 1: an analysis  
836 using U.S. death certificates. *Am J Hum Genet*. 2001;68(5):1110-8.
- 837 5. Martin GA, Viskochil D, Bollag G, McCabe PC, Crosier WJ, Haubruck H, et al. The  
838 GAP-related domain of the neurofibromatosis type 1 gene product interacts with ras p21. *Cell*.  
839 1990;63(4):843-9.
- 840 6. Xu GF, Lin B, Tanaka K, Dunn D, Wood D, Gesteland R, et al. The catalytic domain of  
841 the neurofibromatosis type 1 gene product stimulates ras GTPase and complements ira  
842 mutants of *S. cerevisiae*. *Cell*. 1990;63(4):835-41.
- 843 7. Viskochil D, White R, Cawthon R. The neurofibromatosis type 1 gene. *Annu Rev*  
844 *Neurosci*. 1993;16:183-205.
- 845 8. Ratner N, Miller SJ. A RASopathy gene commonly mutated in cancer: the  
846 neurofibromatosis type 1 tumour suppressor. *Nat Rev Cancer*. 2015;15(5):290-301.
- 847 9. Simanshu DK, Nissley DV, McCormick F. RAS Proteins and Their Regulators in  
848 Human Disease. *Cell*. 2017;170(1):17-33.

- 849 10. Abdel-Rahman O, ElHalawani H, Ahmed H. Risk of Selected Cardiovascular Toxicities  
850 in Patients With Cancer Treated With MEK Inhibitors: A Comparative Systematic Review and  
851 Meta-Analysis. *J Glob Oncol.* 2015;1(2):73-82.
- 852 11. Avery RA, Trimboli-Heidler C, Kilburn LB. Separation of outer retinal layers secondary  
853 to selumetinib. *J AAPOS.* 2016;20(3):268-71.
- 854 12. Baldo F, Magnolato A, Barbi E, Bruno I. Selumetinib side effects in children treated for  
855 plexiform neurofibromas: first case reports of peripheral edema and hair color change. *BMC*  
856 *Pediatr.* 2021;21(1):67.
- 857 13. Gross AM, Wolters PL, Dombi E, Baldwin A, Whitcomb P, Fisher MJ, et al. Selumetinib  
858 in Children with Inoperable Plexiform Neurofibromas. *N Engl J Med.* 2020;382(15):1430-42.
- 859 14. Kaelin WG, Jr. The concept of synthetic lethality in the context of anticancer therapy.  
860 *Nat Rev Cancer.* 2005;5(9):689-98.
- 861 15. Lord CJ, Ashworth A. PARP inhibitors: Synthetic lethality in the clinic. *Science.*  
862 2017;355(6330):1152-8.
- 863 16. Ryan CJ, Bajrami I, Lord CJ. Synthetic Lethality and Cancer - Penetrance as the Major  
864 Barrier. *Trends Cancer.* 2018;4(10):671-83.
- 865 17. Valvezan AJ, Turner M, Belaid A, Lam HC, Miller SK, McNamara MC, et al. mTORC1  
866 Couples Nucleotide Synthesis to Nucleotide Demand Resulting in a Targetable Metabolic  
867 Vulnerability. *Cancer Cell.* 2017;32(5):624-38 e5.
- 868 18. Nicholson HE, Tariq Z, Housden BE, Jennings RB, Stransky LA, Perrimon N, et al.  
869 HIF-independent synthetic lethality between CDK4/6 inhibition and VHL loss across species.  
870 *Sci Signal.* 2019;12(601).
- 871 19. Housden BE, Valvezan AJ, Kelley C, Sopko R, Hu Y, Roesel C, et al. Identification of  
872 potential drug targets for tuberous sclerosis complex by synthetic screens combining CRISPR-  
873 based knockouts with RNAi. *Sci Signal.* 2015;8(393):rs9.

- 874 20. Housden BE, Li Z, Kelley C, Wang Y, Hu Y, Valvezan AJ, et al. Improved detection of  
875 synthetic lethal interactions in Drosophila cells using variable dose analysis (VDA). Proc Natl  
876 Acad Sci U S A. 2017;114(50):E10755-E62.
- 877 21. Lee H, McManus CJ, Cho DY, Eaton M, Renda F, Somma MP, et al. DNA copy number  
878 evolution in Drosophila cell lines. Genome Biol. 2014;15(8):R70.
- 879 22. Li H, Chang LJ, Neubauer DR, Muir DF, Wallace MR. Immortalization of human normal  
880 and NF1 neurofibroma Schwann cells. Lab Invest. 2016;96(10):1105-15.
- 881 23. Szklarczyk D, Gable AL, Lyon D, Junge A, Wyder S, Huerta-Cepas J, et al. STRING  
882 v11: protein-protein association networks with increased coverage, supporting functional  
883 discovery in genome-wide experimental datasets. Nucleic Acids Res. 2019;47(D1):D607-D13.
- 884 24. Shannon P, Markiel A, Ozier O, Baliga NS, Wang JT, Ramage D, et al. Cytoscape: a  
885 software environment for integrated models of biomolecular interaction networks. Genome  
886 Res. 2003;13(11):2498-504.
- 887 25. Homewood CA, Warhurst DC, Peters W, Baggaley VC. Lysosomes, pH and the anti-  
888 malarial action of chloroquine. Nature. 1972;235(5332):50-2.
- 889 26. Mauvezin C, Neufeld TP. Bafilomycin A1 disrupts autophagic flux by inhibiting both V-  
890 ATPase-dependent acidification and Ca-P60A/SERCA-dependent autophagosome-lysosome  
891 fusion. Autophagy. 2015;11(8):1437-8.
- 892 27. Ursing J, Rombo L, Eksborg S, Larson L, Bruvoll A, Tarning J, et al. High-Dose  
893 Chloroquine for Uncomplicated Plasmodium falciparum Malaria Is Well Tolerated and Causes  
894 Similar QT Interval Prolongation as Standard-Dose Chloroquine in Children. Antimicrob  
895 Agents Chemother. 2020;64(3).
- 896 28. Levy JMM, Towers CG, Thorburn A. Targeting autophagy in cancer. Nat Rev Cancer.  
897 2017;17(9):528-42.

- 898 29. Kocaturk NM, Akkoc Y, Kig C, Bayraktar O, Gozuacik D, Kutlu O. Autophagy as a  
899 molecular target for cancer treatment. *Eur J Pharm Sci.* 2019;134:116-37.
- 900 30. Sorensen MG, Henriksen K, Neutzsky-Wulff AV, Dziegiel MH, Karsdal MA. Diphyllin,  
901 a novel and naturally potent V-ATPase inhibitor, abrogates acidification of the osteoclastic  
902 resorption lacunae and bone resorption. *J Bone Miner Res.* 2007;22(10):1640-8.
- 903 31. King LB, Boto T, Botero V, Aviles AM, Jomsky BM, Joseph C, et al. Developmental  
904 loss of neurofibromin across distributed neuronal circuits drives excessive grooming in  
905 *Drosophila*. *PLoS Genet.* 2020;16(7):e1008920.
- 906 32. Moscato EH, Dubowy C, Walker JA, Kayser MS. Social Behavioral Deficits with Loss  
907 of Neurofibromin Emerge from Peripheral Chemosensory Neuron Dysfunction. *Cell Rep.*  
908 2020;32(1):107856.
- 909 33. Bai L, Lee Y, Hsu CT, Williams JA, Cavanaugh D, Zheng X, et al. A Conserved  
910 Circadian Function for the Neurofibromatosis 1 Gene. *Cell Rep.* 2018;22(13):3416-26.
- 911 34. Walker JA, Gouzi JY, Long JB, Huang S, Maher RC, Xia H, et al. Genetic and  
912 functional studies implicate synaptic overgrowth and ring gland cAMP/PKA signaling defects  
913 in the *Drosophila melanogaster* neurofibromatosis-1 growth deficiency. *PLoS Genet.*  
914 2013;9(11):e1003958.
- 915 35. Gouzi JY, Moressis A, Walker JA, Apostolopoulou AA, Palmer RH, Bernards A, et al.  
916 The receptor tyrosine kinase Alk controls neurofibromin functions in *Drosophila* growth and  
917 learning. *PLoS Genet.* 2011;7(9):e1002281.
- 918 36. Liao CP, Pradhan S, Chen Z, Patel AJ, Booker RC, Le LQ. The role of nerve  
919 microenvironment for neurofibroma development. *Oncotarget.* 2016;7(38):61500-8.
- 920 37. Markham A, Keam SJ. Selumetinib: First Approval. *Drugs.* 2020;80(9):931-7.
- 921 38. Zhang XJ, Chen S, Huang KX, Le WD. Why should autophagic flux be assessed? *Acta*  
922 *Pharmacol Sin.* 2013;34(5):595-9.

- 923 39. Mizushima N, Levine B, Cuervo AM, Klionsky DJ. Autophagy fights disease through  
924 cellular self-digestion. *Nature*. 2008;451(7182):1069-75.
- 925 40. O'Donovan TR, O'Sullivan GC, McKenna SL. Induction of autophagy by drug-resistant  
926 esophageal cancer cells promotes their survival and recovery following treatment with  
927 chemotherapeutics. *Autophagy*. 2011;7(5):509-24.
- 928 41. Peng X, Gong F, Chen Y, Jiang Y, Liu J, Yu M, et al. Autophagy promotes paclitaxel  
929 resistance of cervical cancer cells: involvement of Warburg effect activated hypoxia-induced  
930 factor 1-alpha-mediated signaling. *Cell Death Dis*. 2014;5:e1367.
- 931 42. Chang TK, Shrivage BV, Hayes SD, Powers CM, Simin RT, Wade Harper J, et al.  
932 Uba1 functions in Atg7- and Atg3-independent autophagy. *Nat Cell Biol*. 2013;15(9):1067-78.
- 933 43. Byun JY, Yoon CH, An S, Park IC, Kang CM, Kim MJ, et al. The Rac1/MKK7/JNK  
934 pathway signals upregulation of Atg5 and subsequent autophagic cell death in response to  
935 oncogenic Ras. *Carcinogenesis*. 2009;30(11):1880-8.
- 936 44. Kim MJ, Woo SJ, Yoon CH, Lee JS, An S, Choi YH, et al. Involvement of autophagy  
937 in oncogenic K-Ras-induced malignant cell transformation. *J Biol Chem*. 2011;286(15):12924-  
938 32.
- 939 45. Golden EB, Cho HY, Jahanian A, Hofman FM, Louie SG, Schonthal AH, et al.  
940 Chloroquine enhances temozolomide cytotoxicity in malignant gliomas by blocking autophagy.  
941 *Neurosurg Focus*. 2014;37(6):E12.
- 942 46. Zanotto-Filho A, Braganhol E, Klafke K, Figueiro F, Terra SR, Paludo FJ, et al.  
943 Autophagy inhibition improves the efficacy of curcumin/temozolomide combination therapy in  
944 glioblastomas. *Cancer Lett*. 2015;358(2):220-31.
- 945 47. Mei L, Chen Y, Wang Z, Wang J, Wan J, Yu C, et al. Synergistic anti-tumour effects of  
946 tetrandrine and chloroquine combination therapy in human cancer: a potential antagonistic  
947 role for p21. *Br J Pharmacol*. 2015;172(9):2232-45.



- 948 48. Farrow JM, Yang JC, Evans CP. Autophagy as a modulator and target in prostate  
949 cancer. *Nat Rev Urol*. 2014;11(9):508-16.
- 950 49. Lefort S, Joffre C, Kieffer Y, Givel AM, Bourachot B, Zago G, et al. Inhibition of  
951 autophagy as a new means of improving chemotherapy efficiency in high-LC3B triple-negative  
952 breast cancers. *Autophagy*. 2014;10(12):2122-42.
- 953 50. Yang A, Kimmelman AC. Inhibition of autophagy attenuates pancreatic cancer growth  
954 independent of TP53/TRP53 status. *Autophagy*. 2014;10(9):1683-4.
- 955 51. Tsuji G, Takai-Yumine A, Kato T, Furue M. Metalloproteinase 1 downregulation in  
956 neurofibromatosis 1: Therapeutic potential of antimalarial hydroxychloroquine and  
957 chloroquine. *Cell Death Dis*. 2021;12(6):513.
- 958 52. Tang MC, Wu MY, Hwang MH, Chang YT, Huang HJ, Lin AM, et al. Chloroquine  
959 enhances gefitinib cytotoxicity in gefitinib-resistant nonsmall cell lung cancer cells. *PLoS One*.  
960 2015;10(3):e0119135.
- 961 53. Troiani T, Vecchione L, Martinelli E, Capasso A, Costantino S, Ciuffreda LP, et al.  
962 Intrinsic resistance to selumetinib, a selective inhibitor of MEK1/2, by cAMP-dependent protein  
963 kinase A activation in human lung and colorectal cancer cells. *Br J Cancer*.  
964 2012;106(10):1648-59.
- 965 54. Eng CH, Wang Z, Tkach D, Toral-Barza L, Ugwonalu S, Liu S, et al. Macroautophagy  
966 is dispensable for growth of KRAS mutant tumors and chloroquine efficacy. *Proc Natl Acad  
967 Sci U S A*. 2016;113(1):182-7.
- 968 55. Jia L, Wang J, Wu T, Wu J, Ling J, Cheng B. In vitro and in vivo antitumor effects of  
969 chloroquine on oral squamous cell carcinoma. *Mol Med Rep*. 2017;16(5):5779-86.
- 970 56. Schmukler E, Kloog Y, Pinkas-Kramarski R. Ras and autophagy in cancer  
971 development and therapy. *Oncotarget*. 2014;5(3):577-86.

- 972 57. Guo JY, Chen HY, Mathew R, Fan J, Strohecker AM, Karsli-Uzunbas G, et al.  
973 Activated Ras requires autophagy to maintain oxidative metabolism and tumorigenesis.  
974 *Genes Dev.* 2011;25(5):460-70.
- 975 58. Morgan MJ, Gamez G, Menke C, Hernandez A, Thorburn J, Gidan F, et al. Regulation  
976 of autophagy and chloroquine sensitivity by oncogenic RAS in vitro is context-dependent.  
977 *Autophagy.* 2014;10(10):1814-26.
- 978 59. Downward J. Targeting RAS signalling pathways in cancer therapy. *Nat Rev Cancer.*  
979 2003;3(1):11-22.
- 980 60. Kinsey CG, Camolotto SA, Boespflug AM, Guillen KP, Foth M, Truong A, et al.  
981 Protective autophagy elicited by RAF-->MEK-->ERK inhibition suggests a treatment strategy  
982 for RAS-driven cancers. *Nat Med.* 2019;25(4):620-7.
- 983 61. Housden BE, Nicholson HE, Perrimon N. Synthetic Lethality Screens Using RNAi in  
984 Combination with CRISPR-based Knockout in *Drosophila* Cells. *Bio Protoc.* 2017;7(3).
- 985 62. Shalem O, Sanjana NE, Hartenian E, Shi X, Scott DA, Mikkelsen T, et al. Genome-  
986 scale CRISPR-Cas9 knockout screening in human cells. *Science.* 2014;343(6166):84-7.
- 987 63. Sierzputowska K, Baxter CR, Housden BE. Variable Dose Analysis: A Novel High-  
988 throughput RNAi Screening Method for *Drosophila* Cells. *Bio Protoc.* 2018;8(24):e3112.
- 989 64. Ren X, Sun J, Housden BE, Hu Y, Roesel C, Lin S, et al. Optimized gene editing  
990 technology for *Drosophila melanogaster* using germ line-specific Cas9. *Proc Natl Acad Sci U*  
991 *S A.* 2013;110(47):19012-7.
- 992 65. Walker JA, Tchoudakova AV, McKenney PT, Brill S, Wu D, Cowley GS, et al. Reduced  
993 growth of *Drosophila* neurofibromatosis 1 mutants reflects a non-cell-autonomous requirement  
994 for GTPase-Activating Protein activity in larval neurons. *Genes Dev.* 2006;20(23):3311-23.

995 66. Dietzl G, Chen D, Schnorrer F, Su KC, Barinova Y, Fellner M, et al. A genome-wide  
996 transgenic RNAi library for conditional gene inactivation in *Drosophila*. *Nature*.  
997 2007;448(7150):151-6.

998
